# Supplementary material for: Molecular anatomy of the thalamic complex and the underlying transcription factors
Source: Springer Nature journal article supplement (doi:10.1007/s00429-015-1052-5), 2015-05-11
Supplement: MOESM1 [file 8502600]

## Supplementary Data 1 - AGEA analysis

Accessed 5 march 2013

AGEA hyperlink

| Position of seed voxel                                       | Seed voxel | Pearson correlation values |        |        |        |        | Mean correlation | Standard Deviation |
|--------------------------------------------------------------|------------|----------------------------|--------|--------|--------|--------|------------------|--------------------|
| <a href="http://map.org/agea?seed=P">map.org/agea?seed=P</a> | DLG        | 1.0000                     | 0.9863 | 0.9262 | 1.0000 | 0.9507 | 0.9726           | 0.0329             |
|                                                              | PG         | 0.8244                     | 0.7772 | 0.8096 | 0.7616 | 0.7660 | 0.7878           | 0.0278             |
|                                                              | MGN        | 0.7590                     | 0.8041 | 0.7299 | 0.8624 | 0.8569 | 0.8025           | 0.0586             |
|                                                              | VPL/VPM    | 0.9325                     | 0.9236 | 0.9235 | 0.9343 | 0.9336 | 0.9295           | 0.0055             |
|                                                              | VL/VA      | 0.9186                     | 0.9234 | 0.9053 | 0.9090 | 0.9137 | 0.9140           | 0.0073             |
|                                                              | VM         | 0.8777                     | 0.8820 | 0.8898 | 0.8789 | 0.8994 | 0.8856           | 0.0091             |
|                                                              | MD         | 0.9016                     | 0.8819 | 0.9050 | 0.9099 | 0.9079 | 0.9013           | 0.0113             |
|                                                              | LD         | 0.8191                     | 0.8319 | 0.8191 | 0.9059 | 0.9130 | 0.8578           | 0.0475             |
|                                                              | Po         | 0.9080                     | 0.8746 | 0.8573 | 0.8902 | 0.9012 | 0.8863           | 0.0205             |
|                                                              | AD         | 0.8115                     | 0.8482 | 0.8482 | 0.8128 | 0.8467 | 0.8335           | 0.0195             |
|                                                              | AM         | 0.8561                     | 0.8313 | 0.8319 | 0.8248 | 0.8817 | 0.8452           | 0.0237             |
|                                                              | AV         | 0.8552                     | 0.8446 | 0.8918 | 0.8849 | 0.8379 | 0.8629           | 0.0242             |
|                                                              | LP         | 0.8390                     | 0.8757 | 0.9039 | 0.8790 | 0.8492 | 0.8694           | 0.0258             |
|                                                              | PV         | 0.7520                     | 0.8061 | 0.6279 | 0.7802 | 0.7863 | 0.7505           | 0.0712             |
|                                                              | PT         | 0.7441                     | 0.7445 | 0.7832 | 0.8151 | 0.7441 | 0.7662           | 0.0321             |
|                                                              | IMD        | 0.8538                     | 0.8681 | 0.8664 | 0.7688 | 0.7748 | 0.8264           | 0.0502             |
|                                                              | Re         | 0.8078                     | 0.8078 | 0.8078 | 0.8125 | 0.8138 | 0.8099           | 0.0030             |
|                                                              | CM         | 0.8202                     | 0.8415 | 0.8106 | 0.8167 | 0.8411 | 0.8260           | 0.0144             |
|                                                              | PF         | 0.8068                     | 0.7858 | 0.7776 | 0.7858 | 0.7861 | 0.7884           | 0.0109             |
|                                                              | RT         | 0.8640                     | 0.8698 | 0.7610 | 0.8207 | 0.8565 | 0.8344           | 0.0453             |
| MHb                                                          | 0.6304     | 0.5775                     | 0.6292 | 0.5333 | 0.5610 | 0.5863 | 0.0428           |                    |
| LHb                                                          | 0.6292     | 0.6460                     | 0.7185 | 0.7287 | 0.7628 | 0.6970 | 0.0570           |                    |
| ZI                                                           | 0.7475     | 0.7820                     | 0.7675 | 0.7706 | 0.8556 | 0.7846 | 0.0416           |                    |
| SPF                                                          | 0.8029     | 0.7724                     | 0.7896 | 0.8674 | 0.8270 | 0.8119 | 0.0369           |                    |

| Position of seed voxel                                       | Seed voxel | Pearson correlation values |        |        |        |        | Mean correlation | Standard Deviation |
|--------------------------------------------------------------|------------|----------------------------|--------|--------|--------|--------|------------------|--------------------|
| <a href="http://map.org/agea?seed=P">map.org/agea?seed=P</a> | DLG        | 0.7792                     | 0.7846 | 0.8091 | 0.8429 | 0.8148 | 0.8061           | 0.0256             |
|                                                              | PG         | 1.0000                     | 0.9812 | 0.9808 | 0.9496 | 0.9808 | 0.9785           | 0.0181             |
|                                                              | MGN        | 0.7947                     | 0.7340 | 0.8230 | 0.7248 | 0.7248 | 0.7603           | 0.0456             |
|                                                              | VPL/VPM    | 0.7743                     | 0.7663 | 0.8149 | 0.8270 | 0.7625 | 0.7890           | 0.0298             |
|                                                              | VL/VA      | 0.7841                     | 0.7643 | 0.7761 | 0.7596 | 0.7781 | 0.7724           | 0.0102             |
|                                                              | VM         | 0.8204                     | 0.8091 | 0.7695 | 0.7815 | 0.7953 | 0.7952           | 0.0205             |
|                                                              | MD         | 0.7929                     | 0.7957 | 0.7734 | 0.7731 | 0.7757 | 0.7822           | 0.0112             |
|                                                              | LD         | 0.8120                     | 0.8010 | 0.8134 | 0.7949 | 0.7888 | 0.8020           | 0.0107             |
|                                                              | Po         | 0.7878                     | 0.7563 | 0.7590 | 0.8194 | 0.8378 | 0.7921           | 0.0362             |
|                                                              | AD         | 0.8146                     | 0.8206 | 0.8146 | 0.8189 | 0.8206 | 0.8179           | 0.0031             |
|                                                              | AM         | 0.8627                     | 0.7493 | 0.7858 | 0.7493 | 0.7916 | 0.7877           | 0.0463             |
|                                                              | AV         | 0.7869                     | 0.8206 | 0.7733 | 0.7515 | 0.7733 | 0.7811           | 0.0255             |
|                                                              | LP         | 0.8068                     | 0.7768 | 0.7702 | 0.7708 | 0.8033 | 0.7856           | 0.0180             |
|                                                              | PV         | 0.8056                     | 0.8103 | 0.7999 | 0.8242 | 0.8123 | 0.8105           | 0.0090             |
|                                                              | PT         | 0.8171                     | 0.8284 | 0.8286 | 0.8149 | 0.8171 | 0.8212           | 0.0067             |
|                                                              | IMD        | 0.8170                     | 0.8139 | 0.7887 | 0.7844 | 0.7837 | 0.7975           | 0.0165             |
|                                                              | Re         | 0.8152                     | 0.8165 | 0.8098 | 0.8098 | 0.8452 | 0.8193           | 0.0148             |
|                                                              | CM         | 0.7911                     | 0.7849 | 0.8132 | 0.8264 | 0.7865 | 0.8004           | 0.0184             |
|                                                              | PF         | 0.8583                     | 0.8583 | 0.8156 | 0.8345 | 0.8424 | 0.8418           | 0.0179             |
|                                                              | RT         | 0.8685                     | 0.8814 | 0.8727 | 0.8689 | 0.8605 | 0.8704           | 0.0076             |
| MHb                                                          | 0.5602     | 0.6166                     | 0.6431 | 0.6658 | 0.6276 | 0.6227 | 0.0395           |                    |
| LHb                                                          | 0.9000     | 0.8912                     | 0.8792 | 0.8633 | 0.8370 | 0.8741 | 0.0249           |                    |
| ZI                                                           | 0.9376     | 0.9310                     | 0.9236 | 0.9212 | 0.9200 | 0.9267 | 0.0075           |                    |
| SPF                                                          | 0.9010     | 0.8971                     | 0.8809 | 0.9236 | 0.9085 | 0.9022 | 0.0156           |                    |

| Position of seed voxel                                       | Seed voxel | Pearson correlation values |        |        |        |        | Mean correlation | Standard Deviation |
|--------------------------------------------------------------|------------|----------------------------|--------|--------|--------|--------|------------------|--------------------|
| <a href="http://map.org/agea?seed=P">map.org/agea?seed=P</a> | DLG        | 0.9125                     | 0.8919 | 0.9157 | 0.9079 | 0.8684 | 0.8993           | 0.0195             |
|                                                              | PG         | 0.8011                     | 0.8319 | 0.8011 | 0.8319 | 0.8011 | 0.8134           | 0.0169             |
|                                                              | MGN        | 0.9489                     | 0.9706 | 0.9603 | 0.9593 | 0.9464 | 0.9571           | 0.0097             |
|                                                              | VPL/VPM    | 0.8898                     | 0.8838 | 0.8894 | 0.8931 | 0.8841 | 0.8880           | 0.0040             |
|                                                              | VL/VA      | 0.8836                     | 0.8936 | 0.8817 | 0.8867 | 0.8836 | 0.8858           | 0.0047             |
|                                                              | VM         | 0.8720                     | 0.8810 | 0.8760 | 0.8720 | 0.8938 | 0.8790           | 0.0091             |
| MD                                                           | 0.9090     | 0.9149                     | 0.8999 | 0.9012 | 0.9102 | 0.9070 | 0.0063           |                    |

|  |     |        |        |        |        |        |        |        |
|--|-----|--------|--------|--------|--------|--------|--------|--------|
|  | LD  | 0.8153 | 0.8737 | 0.8861 | 0.8804 | 0.8704 | 0.8652 | 0.0285 |
|  | Po  | 0.8979 | 0.9173 | 0.9292 | 0.9426 | 0.9358 | 0.9246 | 0.0176 |
|  | AD  | 0.8241 | 0.7855 | 0.7696 | 0.8118 | 0.7184 | 0.7819 | 0.0414 |
|  | AM  | 0.8033 | 0.8570 | 0.8482 | 0.8791 | 0.8871 | 0.8549 | 0.0329 |
|  | AV  | 0.8681 | 0.8168 | 0.7095 | 0.7710 | 0.7680 | 0.7867 | 0.0593 |
|  | LP  | 0.9293 | 0.9307 | 0.9359 | 0.9241 | 0.9331 | 0.9306 | 0.0044 |
|  | PV  | 0.7199 | 0.7416 | 0.7856 | 0.8152 | 0.7862 | 0.7697 | 0.0383 |
|  | PT  | 0.7341 | 0.7335 | 0.8033 | 0.7817 | 0.7898 | 0.7685 | 0.0326 |
|  | IMD | 0.8099 | 0.8238 | 0.8406 | 0.8587 | 0.8882 | 0.8442 | 0.0306 |
|  | Re  | 0.8003 | 0.8275 | 0.8423 | 0.8089 | 0.7866 | 0.8131 | 0.0220 |
|  | CM  | 0.8425 | 0.8555 | 0.8817 | 0.8825 | 0.8820 | 0.8688 | 0.0187 |
|  | PF  | 0.8795 | 0.8598 | 0.8459 | 0.7992 | 0.7896 | 0.8348 | 0.0389 |
|  | RT  | 0.7433 | 0.7535 | 0.7522 | 0.8126 | 0.8434 | 0.7810 | 0.0444 |
|  | MHb | 0.5950 | 0.5738 | 0.6049 | 0.6136 | 0.5853 | 0.5945 | 0.0157 |
|  | LHb | 0.6700 | 0.7001 | 0.6408 | 0.6414 | 0.6250 | 0.6555 | 0.0298 |
|  | ZI  | 0.8583 | 0.8125 | 0.7817 | 0.8772 | 0.8485 | 0.8356 | 0.0382 |
|  | SPF | 0.8907 | 0.8570 | 0.9069 | 0.7764 | 0.8022 | 0.8466 | 0.0561 |

| Position of seed voxel                                       | Seed voxel | Pearson correlation values |        |        |        |        | Mean correlation | Standard Deviation |
|--------------------------------------------------------------|------------|----------------------------|--------|--------|--------|--------|------------------|--------------------|
| <a href="http://map.org/agea?seed=P">map.org/agea?seed=P</a> | DLG        | 0.9419                     | 0.9238 | 0.9034 | 0.9339 | 0.9416 | 0.9289           | 0.0161             |
|                                                              | PG         | 0.7898                     | 0.6614 | 0.7973 | 0.7642 | 0.7310 | 0.7487           | 0.0553             |
|                                                              | MGN        | 0.8007                     | 0.8178 | 0.8652 | 0.8932 | 0.8726 | 0.8499           | 0.0390             |
|                                                              | VPL/VPM    | 0.9894                     | 0.9880 | 0.9944 | 0.9839 | 0.9776 | 0.9867           | 0.0063             |
|                                                              | VL/VA      | 0.9473                     | 0.8925 | 0.9182 | 0.8805 | 0.9168 | 0.9111           | 0.0259             |
|                                                              | VM         | 0.9038                     | 0.8684 | 0.8680 | 0.8883 | 0.8773 | 0.8812           | 0.0151             |
|                                                              | MD         | 0.9144                     | 0.9144 | 0.9279 | 0.9100 | 0.9193 | 0.9172           | 0.0068             |
|                                                              | LD         | 0.9410                     | 0.9523 | 0.9556 | 0.9241 | 0.9426 | 0.9431           | 0.0123             |
|                                                              | Po         | 0.8811                     | 0.8899 | 0.9039 | 0.8899 | 0.8604 | 0.8850           | 0.0160             |
|                                                              | AD         | 0.8404                     | 0.8226 | 0.8548 | 0.8147 | 0.8871 | 0.8439           | 0.0287             |
|                                                              | AM         | 0.7879                     | 0.7988 | 0.8142 | 0.7911 | 0.8221 | 0.8028           | 0.0148             |
|                                                              | AV         | 0.8267                     | 0.8199 | 0.8639 | 0.8721 | 0.8068 | 0.8379           | 0.0286             |
|                                                              | LP         | 0.8308                     | 0.8588 | 0.8722 | 0.8401 | 0.8588 | 0.8521           | 0.0165             |
|                                                              | PV         | 0.6566                     | 0.6869 | 0.7274 | 0.8012 | 0.7166 | 0.7177           | 0.0542             |
|                                                              | PT         | 0.8041                     | 0.7971 | 0.7342 | 0.7357 | 0.7342 | 0.7611           | 0.0362             |
|                                                              | IMD        | 0.8351                     | 0.8519 | 0.8683 | 0.8659 | 0.8091 | 0.8461           | 0.0245             |
|                                                              | Re         | 0.7758                     | 0.7358 | 0.7159 | 0.7860 | 0.7758 | 0.7579           | 0.0303             |
|                                                              | CM         | 0.7989                     | 0.7989 | 0.8134 | 0.7999 | 0.8077 | 0.8038           | 0.0065             |
|                                                              | PF         | 0.7943                     | 0.8147 | 0.7730 | 0.7628 | 0.7766 | 0.7843           | 0.0205             |
|                                                              | RT         | 0.7810                     | 0.7720 | 0.8466 | 0.7999 | 0.7885 | 0.7976           | 0.0292             |
| MHb                                                          | 0.4711     | 0.5259                     | 0.5489 | 0.5723 | 0.5843 | 0.5405 | 0.0448           |                    |
| LHb                                                          | 0.7125     | 0.6900                     | 0.7377 | 0.7395 | 0.7334 | 0.7226 | 0.0212           |                    |
| ZI                                                           | 0.7220     | 0.7302                     | 0.7689 | 0.7592 | 0.7522 | 0.7465 | 0.0198           |                    |
| SPF                                                          | 0.8442     | 0.8362                     | 0.8044 | 0.8021 | 0.7842 | 0.8142 | 0.0251           |                    |

| Position of seed voxel                                       | Seed voxel | Pearson correlation values |        |        |        |        | Mean correlation | Standard Deviation |
|--------------------------------------------------------------|------------|----------------------------|--------|--------|--------|--------|------------------|--------------------|
| <a href="http://map.org/agea?seed=P">map.org/agea?seed=P</a> | DLG        | 0.9294                     | 0.9293 | 0.9087 | 0.9061 | 0.9216 | 0.9190           | 0.0111             |
|                                                              | PG         | 0.8528                     | 0.7805 | 0.8296 | 0.8272 | 0.7984 | 0.8177           | 0.0284             |
|                                                              | MGN        | 0.8006                     | 0.7742 | 0.8006 | 0.8200 | 0.8029 | 0.7997           | 0.0164             |
|                                                              | VPL/VPM    | 0.9378                     | 0.9432 | 0.9442 | 0.9369 | 0.9440 | 0.9412           | 0.0036             |
|                                                              | VL/VA      | 0.9881                     | 0.9915 | 1.0000 | 0.9703 | 0.9832 | 0.9866           | 0.0110             |
|                                                              | VM         | 0.9327                     | 0.9331 | 0.9297 | 0.9205 | 0.8781 | 0.9188           | 0.0233             |
|                                                              | MD         | 0.9287                     | 0.9363 | 0.9178 | 0.9206 | 0.9369 | 0.9281           | 0.0088             |
|                                                              | LD         | 0.8559                     | 0.9402 | 0.8926 | 0.9004 | 0.9183 | 0.9015           | 0.0314             |
|                                                              | Po         | 0.8899                     | 0.8876 | 0.8785 | 0.8899 | 0.9072 | 0.8906           | 0.0104             |
|                                                              | AD         | 0.8740                     | 0.8798 | 0.7449 | 0.8740 | 0.8481 | 0.8442           | 0.0568             |
|                                                              | AM         | 0.8985                     | 0.8893 | 0.8465 | 0.8448 | 0.8626 | 0.8683           | 0.0246             |
|                                                              | AV         | 0.8355                     | 0.8643 | 0.8514 | 0.9118 | 0.8540 | 0.8634           | 0.0290             |
|                                                              | LP         | 0.8788                     | 0.8788 | 0.8655 | 0.8797 | 0.8974 | 0.8800           | 0.0114             |
|                                                              | PV         | 0.7862                     | 0.8121 | 0.8517 | 0.7893 | 0.7704 | 0.8019           | 0.0315             |
|                                                              | PT         | 0.7806                     | 0.7482 | 0.8428 | 0.8485 | 0.7806 | 0.8001           | 0.0436             |
|                                                              | IMD        | 0.8299                     | 0.8723 | 0.8883 | 0.8836 | 0.8861 | 0.8720           | 0.0243             |
|                                                              | Re         | 0.7602                     | 0.7936 | 0.8179 | 0.8367 | 0.7764 | 0.7970           | 0.0308             |
|                                                              | CM         | 0.8591                     | 0.8735 | 0.8669 | 0.8687 | 0.8839 | 0.8704           | 0.0091             |
| PF                                                           | 0.8099     | 0.7968                     | 0.7766 | 0.8182 | 0.7989 | 0.8001 | 0.0157           |                    |

|  |     |        |        |        |        |        |        |        |
|--|-----|--------|--------|--------|--------|--------|--------|--------|
|  | RT  | 0.8091 | 0.8004 | 0.8357 | 0.8671 | 0.8623 | 0.8349 | 0.0302 |
|  | MHb | 0.5039 | 0.5592 | 0.5835 | 0.5962 | 0.6536 | 0.5793 | 0.0546 |
|  | LHb | 0.8242 | 0.7541 | 0.7575 | 0.7355 | 0.7987 | 0.7740 | 0.0363 |
|  | ZI  | 0.7986 | 0.7876 | 0.7805 | 0.8601 | 0.8253 | 0.8104 | 0.0326 |
|  | SPF | 0.8236 | 0.8006 | 0.8390 | 0.8600 | 0.7665 | 0.8179 | 0.0360 |

| Position of seed voxel                                       | Seed voxel | Pearson correlation values |        |        |        |        | Mean correlation | Standard Deviation |
|--------------------------------------------------------------|------------|----------------------------|--------|--------|--------|--------|------------------|--------------------|
| <a href="http://map.org/agea?seed=P">map.org/agea?seed=P</a> | DLG        | 0.8925                     | 0.8869 | 0.8857 | 0.8822 | 0.8709 | 0.8836           | 0.0080             |
|                                                              | PG         | 0.8333                     | 0.7953 | 0.7687 | 0.8184 | 0.8004 | 0.8032           | 0.0245             |
|                                                              | MGN        | 0.8538                     | 0.8178 | 0.8381 | 0.7012 | 0.8178 | 0.8057           | 0.0604             |
|                                                              | VPL/VPM    | 0.8832                     | 0.8826 | 0.8958 | 0.9104 | 0.8941 | 0.8932           | 0.0114             |
|                                                              | VL/VA      | 0.9328                     | 0.9228 | 0.9319 | 0.9092 | 0.9185 | 0.9230           | 0.0098             |
|                                                              | VM         | 0.9569                     | 0.9627 | 0.9545 | 0.9262 | 0.9349 | 0.9470           | 0.0157             |
|                                                              | MD         | 0.9294                     | 0.9011 | 0.9014 | 0.9294 | 0.9097 | 0.9142           | 0.0143             |
|                                                              | LD         | 0.8894                     | 0.8934 | 0.8969 | 0.8863 | 0.9101 | 0.8952           | 0.0092             |
|                                                              | Po         | 0.9044                     | 0.8101 | 0.9108 | 0.9066 | 0.9037 | 0.8871           | 0.0431             |
|                                                              | AD         | 0.8498                     | 0.8254 | 0.8498 | 0.8285 | 0.7470 | 0.8201           | 0.0424             |
|                                                              | AM         | 0.8950                     | 0.8688 | 0.8631 | 0.8828 | 0.8621 | 0.8744           | 0.0142             |
|                                                              | AV         | 0.8487                     | 0.8506 | 0.8557 | 0.8506 | 0.8487 | 0.8509           | 0.0029             |
|                                                              | LP         | 0.8868                     | 0.8913 | 0.8918 | 0.8911 | 0.9129 | 0.8948           | 0.0103             |
|                                                              | PV         | 0.8040                     | 0.7776 | 0.7805 | 0.8270 | 0.8139 | 0.8006           | 0.0213             |
|                                                              | PT         | 0.8671                     | 0.8654 | 0.8671 | 0.8408 | 0.8073 | 0.8495           | 0.0261             |
|                                                              | IMD        | 0.8847                     | 0.8841 | 0.9110 | 0.9216 | 0.9252 | 0.9053           | 0.0198             |
|                                                              | Re         | 0.8497                     | 0.8662 | 0.8669 | 0.8856 | 0.8794 | 0.8696           | 0.0138             |
|                                                              | CM         | 0.8836                     | 0.8855 | 0.9096 | 0.9070 | 0.8703 | 0.8912           | 0.0167             |
|                                                              | PF         | 0.8250                     | 0.8181 | 0.8195 | 0.8122 | 0.8316 | 0.8213           | 0.0073             |
|                                                              | RT         | 0.7879                     | 0.7929 | 0.8576 | 0.8797 | 0.7581 | 0.8152           | 0.0511             |
| MHb                                                          | 0.6622     | 0.6819                     | 0.6951 | 0.6104 | 0.5684 | 0.6436 | 0.0530           |                    |
| LHb                                                          | 0.7511     | 0.7699                     | 0.7910 | 0.7828 | 0.7900 | 0.7770 | 0.0167           |                    |
| ZI                                                           | 0.8198     | 0.7755                     | 0.8088 | 0.8042 | 0.7950 | 0.8007 | 0.0167           |                    |
| SPF                                                          | 0.8700     | 0.9029                     | 0.9063 | 0.9077 | 0.8999 | 0.8974 | 0.0156           |                    |

| Position of seed voxel                                       | Seed voxel | Pearson correlation values |        |        |        |        | Mean correlation | Standard Deviation |
|--------------------------------------------------------------|------------|----------------------------|--------|--------|--------|--------|------------------|--------------------|
| <a href="http://map.org/agea?seed=P">map.org/agea?seed=P</a> | DLG        | 0.8904                     | 0.9145 | 0.9174 | 0.9058 | 0.9208 | 0.9098           | 0.0122             |
|                                                              | PG         | 0.7941                     | 0.7941 | 0.7556 | 0.8101 | 0.7442 | 0.7796           | 0.0282             |
|                                                              | MGN        | 0.8648                     | 0.9008 | 0.9125 | 0.9081 | 0.9273 | 0.9027           | 0.0233             |
|                                                              | VPL/VPM    | 0.9087                     | 0.9154 | 0.9068 | 0.9104 | 0.9089 | 0.9100           | 0.0033             |
|                                                              | VL/VA      | 0.9512                     | 0.9437 | 0.9512 | 0.9335 | 0.9301 | 0.9419           | 0.0098             |
|                                                              | VM         | 0.9313                     | 0.9438 | 0.9369 | 0.9326 | 0.9369 | 0.9363           | 0.0049             |
|                                                              | MD         | 0.9562                     | 0.9905 | 0.9847 | 0.9767 | 0.9744 | 0.9765           | 0.0130             |
|                                                              | LD         | 0.9478                     | 0.9466 | 0.9469 | 0.9272 | 0.9080 | 0.9353           | 0.0175             |
|                                                              | Po         | 0.9443                     | 0.9405 | 0.9448 | 0.9326 | 0.9286 | 0.9382           | 0.0072             |
|                                                              | AD         | 0.8660                     | 0.8789 | 0.9789 | 0.7604 | 0.8325 | 0.8633           | 0.0793             |
|                                                              | AM         | 0.9120                     | 0.9003 | 0.9210 | 0.9164 | 0.9081 | 0.9116           | 0.0079             |
|                                                              | AV         | 0.9114                     | 0.8744 | 0.8857 | 0.8786 | 0.8857 | 0.8872           | 0.0144             |
|                                                              | LP         | 0.8886                     | 0.9140 | 0.9216 | 0.9362 | 0.9279 | 0.9177           | 0.0182             |
|                                                              | PV         | 0.7736                     | 0.7885 | 0.8233 | 0.8545 | 0.8517 | 0.8183           | 0.0365             |
|                                                              | PT         | 0.8191                     | 0.8908 | 0.8630 | 0.8908 | 0.8908 | 0.8709           | 0.0314             |
|                                                              | IMD        | 0.9369                     | 0.9389 | 0.9310 | 0.8377 | 0.8982 | 0.9085           | 0.0429             |
|                                                              | Re         | 0.8899                     | 0.8661 | 0.8423 | 0.9029 | 0.8493 | 0.8701           | 0.0259             |
|                                                              | CM         | 0.8966                     | 0.9070 | 0.9473 | 0.9380 | 0.9473 | 0.9272           | 0.0238             |
|                                                              | PF         | 0.8803                     | 0.8662 | 0.8585 | 0.8357 | 0.8097 | 0.8501           | 0.0278             |
|                                                              | RT         | 0.8891                     | 0.9077 | 0.7966 | 0.8110 | 0.7869 | 0.8383           | 0.0560             |
| MHb                                                          | 0.5027     | 0.5693                     | 0.5889 | 0.5962 | 0.6693 | 0.5853 | 0.0597           |                    |
| LHb                                                          | 0.8465     | 0.8678                     | 0.7759 | 0.6894 | 0.7881 | 0.7935 | 0.0698           |                    |
| ZI                                                           | 0.7871     | 0.7905                     | 0.7803 | 0.8184 | 0.7808 | 0.7914 | 0.0157           |                    |
| SPF                                                          | 0.8079     | 0.8643                     | 0.8869 | 0.8116 | 0.8562 | 0.8454 | 0.0344           |                    |

| Position of seed voxel | Seed voxel | Pearson correlation values |        |        |        |        | Mean correlation | Standard Deviation |
|------------------------|------------|----------------------------|--------|--------|--------|--------|------------------|--------------------|
|                        | DLG        | 0.9117                     | 0.9170 | 0.9036 | 0.9083 | 0.8824 | 0.9046           | 0.0133             |
|                        | PG         | 0.8199                     | 0.8199 | 0.7967 | 0.7493 | 0.8333 | 0.8038           | 0.0332             |
|                        | MGN        | 0.8394                     | 0.7903 | 0.8633 | 0.8464 | 0.7952 | 0.8269           | 0.0324             |
|                        | VPL/VPM    | 0.8917                     | 0.8956 | 0.9091 | 0.9246 | 0.9317 | 0.9105           | 0.0175             |
|                        | VL/VA      | 0.9495                     | 0.9539 | 0.9353 | 0.9371 | 0.9174 | 0.9386           | 0.0143             |

|                                                              |        |        |        |        |        |        |        |        |
|--------------------------------------------------------------|--------|--------|--------|--------|--------|--------|--------|--------|
| <a href="http://map.org/agea?seed=P">map.org/agea?seed=P</a> | VM     | 0.8729 | 0.9093 | 0.9145 | 0.8825 | 0.8656 | 0.8890 | 0.0219 |
|                                                              | MD     | 0.8932 | 0.9181 | 0.9216 | 0.8960 | 0.9074 | 0.9073 | 0.0127 |
|                                                              | LD     | 0.9365 | 0.9543 | 0.9090 | 0.9282 | 0.9880 | 0.9432 | 0.0299 |
|                                                              | Po     | 0.8840 | 0.8832 | 0.9021 | 0.9098 | 0.8758 | 0.8910 | 0.0143 |
|                                                              | AD     | 0.8626 | 0.8267 | 0.8519 | 0.8626 | 0.8864 | 0.8580 | 0.0216 |
|                                                              | AM     | 0.8427 | 0.8969 | 0.8755 | 0.9162 | 0.9009 | 0.8864 | 0.0284 |
|                                                              | AV     | 0.9295 | 0.8518 | 0.8578 | 0.9302 | 0.9586 | 0.9056 | 0.0479 |
|                                                              | LP     | 0.8814 | 0.9037 | 0.8705 | 0.8774 | 0.9094 | 0.8885 | 0.0171 |
|                                                              | PV     | 0.7583 | 0.7617 | 0.8251 | 0.8204 | 0.8144 | 0.7960 | 0.0331 |
|                                                              | PT     | 0.7635 | 0.7647 | 0.8191 | 0.8324 | 0.8097 | 0.7979 | 0.0319 |
|                                                              | IMD    | 0.8642 | 0.8726 | 0.8807 | 0.8589 | 0.7523 | 0.8457 | 0.0529 |
|                                                              | Re     | 0.7484 | 0.8081 | 0.8684 | 0.8890 | 0.8283 | 0.8284 | 0.0550 |
|                                                              | CM     | 0.8415 | 0.8642 | 0.8783 | 0.8896 | 0.8832 | 0.8714 | 0.0191 |
|                                                              | PF     | 0.8698 | 0.8941 | 0.8634 | 0.8357 | 0.8389 | 0.8604 | 0.0240 |
|                                                              | RT     | 0.7445 | 0.7533 | 0.8673 | 0.9057 | 0.7625 | 0.8067 | 0.0744 |
|                                                              | MHb    | 0.6602 | 0.6743 | 0.6814 | 0.6471 | 0.6453 | 0.6617 | 0.0161 |
|                                                              | LHb    | 0.6774 | 0.6823 | 0.7659 | 0.7559 | 0.8512 | 0.7465 | 0.0713 |
|                                                              | ZI     | 0.7919 | 0.8101 | 0.8559 | 0.8634 | 0.8360 | 0.8315 | 0.0302 |
| SPF                                                          | 0.8183 | 0.8542 | 0.8765 | 0.8261 | 0.8482 | 0.8447 | 0.0232 |        |

| Position of seed voxel                                       | Seed voxel | Pearson correlation values |        |        |        |        | Mean correlation | Standard Deviation |
|--------------------------------------------------------------|------------|----------------------------|--------|--------|--------|--------|------------------|--------------------|
| <a href="http://map.org/agea?seed=P">map.org/agea?seed=P</a> | DLG        | 0.8961                     | 0.8922 | 0.9063 | 0.9103 | 0.9080 | 0.9026           | 0.0079             |
|                                                              | PG         | 0.7746                     | 0.8198 | 0.8308 | 0.8624 | 0.8709 | 0.8317           | 0.0383             |
|                                                              | MGN        | 0.9004                     | 0.9035 | 0.9105 | 0.9087 | 0.9105 | 0.9067           | 0.0045             |
|                                                              | VPL/VPM    | 0.8934                     | 0.9302 | 0.9075 | 0.8793 | 0.8815 | 0.8984           | 0.0210             |
|                                                              | VL/VA      | 0.8784                     | 0.8899 | 0.9004 | 0.9013 | 0.8786 | 0.8897           | 0.0112             |
|                                                              | VM         | 0.8888                     | 0.9046 | 0.8801 | 0.8895 | 0.9046 | 0.8935           | 0.0108             |
|                                                              | MD         | 0.9254                     | 0.9286 | 0.9260 | 0.9317 | 0.9337 | 0.9291           | 0.0036             |
|                                                              | LD         | 0.8936                     | 0.8973 | 0.8845 | 0.8955 | 0.8409 | 0.8824           | 0.0237             |
|                                                              | Po         | 0.9916                     | 0.9862 | 0.9508 | 0.9476 | 0.9799 | 0.9712           | 0.0206             |
|                                                              | AD         | 0.8204                     | 0.8570 | 0.8204 | 0.8570 | 0.8357 | 0.8381           | 0.0183             |
|                                                              | AM         | 0.8798                     | 0.8979 | 0.8949 | 0.8879 | 0.8932 | 0.8907           | 0.0071             |
|                                                              | AV         | 0.8740                     | 0.9081 | 0.8858 | 0.9054 | 0.8948 | 0.8936           | 0.0141             |
|                                                              | LP         | 0.9375                     | 0.9389 | 0.9639 | 0.9546 | 0.9749 | 0.9540           | 0.0161             |
|                                                              | PV         | 0.7920                     | 0.8304 | 0.8502 | 0.8942 | 0.8989 | 0.8531           | 0.0448             |
|                                                              | PT         | 0.8163                     | 0.8020 | 0.8132 | 0.8708 | 0.8479 | 0.8300           | 0.0285             |
|                                                              | IMD        | 0.8726                     | 0.9181 | 0.9125 | 0.9136 | 0.8952 | 0.9024           | 0.0188             |
|                                                              | Re         | 0.8351                     | 0.8560 | 0.8635 | 0.8560 | 0.8764 | 0.8574           | 0.0150             |
|                                                              | CM         | 0.9134                     | 0.9397 | 0.9210 | 0.9137 | 0.9210 | 0.9218           | 0.0107             |
|                                                              | PF         | 0.8598                     | 0.8472 | 0.8379 | 0.8969 | 0.8859 | 0.8655           | 0.0252             |
|                                                              | RT         | 0.8613                     | 0.8016 | 0.8233 | 0.8390 | 0.8002 | 0.8251           | 0.0259             |
| MHb                                                          | 0.6392     | 0.6753                     | 0.5916 | 0.6075 | 0.6177 | 0.6263 | 0.0324           |                    |
| LHb                                                          | 0.7955     | 0.6889                     | 0.7755 | 0.7543 | 0.6987 | 0.7426 | 0.0470           |                    |
| ZI                                                           | 0.8093     | 0.8648                     | 0.8146 | 0.8263 | 0.7805 | 0.8191 | 0.0306           |                    |
| SPF                                                          | 0.8877     | 0.9041                     | 0.9183 | 0.8830 | 0.8997 | 0.8986 | 0.0140           |                    |

| Position of seed voxel                                       | Seed voxel | Pearson correlation values |        |        |        |        | Mean correlation | Standard Deviation |
|--------------------------------------------------------------|------------|----------------------------|--------|--------|--------|--------|------------------|--------------------|
| <a href="http://map.org/agea?seed=P">map.org/agea?seed=P</a> | DLG        | 0.8166                     | 0.8297 | 0.8156 | 0.8128 | 0.8135 | 0.8176           | 0.0069             |
|                                                              | PG         | 0.7809                     | 0.7611 | 0.8252 | 0.7776 | 0.7780 | 0.7846           | 0.0240             |
|                                                              | MGN        | 0.7345                     | 0.7345 | 0.7231 | 0.7366 | 0.7403 | 0.7338           | 0.0064             |
|                                                              | VPL/VPM    | 0.8316                     | 0.8262 | 0.8295 | 0.8386 | 0.8253 | 0.8302           | 0.0053             |
|                                                              | VL/VA      | 0.8481                     | 0.8497 | 0.8326 | 0.8447 | 0.8549 | 0.8460           | 0.0083             |
|                                                              | VM         | 0.8154                     | 0.8156 | 0.7879 | 0.8160 | 0.8254 | 0.8121           | 0.0141             |
|                                                              | MD         | 0.8193                     | 0.8284 | 0.8187 | 0.8165 | 0.8284 | 0.8223           | 0.0057             |
|                                                              | LD         | 0.8708                     | 0.8798 | 0.8576 | 0.8559 | 0.8678 | 0.8664           | 0.0099             |
|                                                              | Po         | 0.8106                     | 0.7777 | 0.7782 | 0.7784 | 0.7831 | 0.7856           | 0.0141             |
|                                                              | AD         | 0.9331                     | 0.9679 | 1.0000 | 0.9679 | 0.9281 | 0.9594           | 0.0294             |
|                                                              | AM         | 0.8583                     | 0.8468 | 0.8845 | 0.8940 | 0.8772 | 0.8722           | 0.0193             |
|                                                              | AV         | 0.9457                     | 0.8637 | 0.8489 | 0.9051 | 0.9184 | 0.8964           | 0.0397             |
|                                                              | LP         | 0.8298                     | 0.8319 | 0.8041 | 0.8029 | 0.8264 | 0.8190           | 0.0143             |
|                                                              | PV         | 0.7533                     | 0.7941 | 0.8858 | 0.8448 | 0.7985 | 0.8153           | 0.0510             |
|                                                              | PT         | 0.8035                     | 0.8012 | 0.8191 | 0.8012 | 0.8035 | 0.8057           | 0.0076             |
|                                                              | IMD        | 0.8115                     | 0.8086 | 0.8092 | 0.8147 | 0.8166 | 0.8121           | 0.0035             |
|                                                              | Re         | 0.8380                     | 0.8211 | 0.8361 | 0.8425 | 0.8019 | 0.8279           | 0.0166             |
|                                                              | CM         | 0.8436                     | 0.8439 | 0.8298 | 0.8188 | 0.8221 | 0.8316           | 0.0118             |

|  |     |        |        |        |        |        |        |        |
|--|-----|--------|--------|--------|--------|--------|--------|--------|
|  | PF  | 0.8237 | 0.8224 | 0.8284 | 0.8312 | 0.8295 | 0.8270 | 0.0038 |
|  | RT  | 0.8166 | 0.8453 | 0.8407 | 0.8456 | 0.8390 | 0.8374 | 0.0120 |
|  | MHb | 0.5842 | 0.8254 | 0.6525 | 0.6614 | 0.6561 | 0.6759 | 0.0893 |
|  | LHb | 0.7910 | 0.7779 | 0.7903 | 0.8102 | 0.8019 | 0.7943 | 0.0123 |
|  | ZI  | 0.8091 | 0.8137 | 0.8178 | 0.8309 | 0.8265 | 0.8196 | 0.0090 |
|  | SPF | 0.8261 | 0.8296 | 0.8126 | 0.8114 | 0.8151 | 0.8190 | 0.0083 |

| Position of seed voxel                                       | Seed voxel | Pearson correlation values |        |        |        |        | Mean correlation | Standard Deviation |
|--------------------------------------------------------------|------------|----------------------------|--------|--------|--------|--------|------------------|--------------------|
| <a href="http://map.org/agea?seed=P">map.org/agea?seed=P</a> | DLG        | 0.8280                     | 0.8096 | 0.8282 | 0.7246 | 0.8200 | 0.8021           | 0.0440             |
|                                                              | PG         | 0.7521                     | 0.7393 | 0.7565 | 0.7639 | 0.7396 | 0.7503           | 0.0107             |
|                                                              | MGN        | 0.8297                     | 0.8611 | 0.8560 | 0.8420 | 0.8018 | 0.8381           | 0.0237             |
|                                                              | VPL/VPM    | 0.7955                     | 0.7702 | 0.7888 | 0.7874 | 0.8248 | 0.7933           | 0.0199             |
|                                                              | VL/VA      | 0.8722                     | 0.8458 | 0.8574 | 0.8673 | 0.8107 | 0.8507           | 0.0245             |
|                                                              | VM         | 0.8899                     | 0.8725 | 0.8638 | 0.8122 | 0.8195 | 0.8516           | 0.0340             |
|                                                              | MD         | 0.8851                     | 0.8868 | 0.8904 | 0.8998 | 0.9154 | 0.8955           | 0.0125             |
|                                                              | LD         | 0.8347                     | 0.8219 | 0.8239 | 0.8473 | 0.7839 | 0.8223           | 0.0237             |
|                                                              | Po         | 0.8665                     | 0.8346 | 0.8459 | 0.8781 | 0.8591 | 0.8568           | 0.0171             |
|                                                              | AD         | 0.8337                     | 0.8810 | 0.8810 | 0.8480 | 0.8176 | 0.8523           | 0.0284             |
|                                                              | AM         | 0.9735                     | 0.9655 | 0.8946 | 0.9540 | 0.9132 | 0.9402           | 0.0345             |
|                                                              | AV         | 0.8529                     | 0.9053 | 0.9290 | 0.8744 | 0.9398 | 0.9003           | 0.0365             |
|                                                              | LP         | 0.8270                     | 0.8067 | 0.8399 | 0.8672 | 0.8780 | 0.8438           | 0.0291             |
|                                                              | PV         | 0.7870                     | 0.8447 | 0.8557 | 0.8416 | 0.8389 | 0.8336           | 0.0268             |
|                                                              | PT         | 0.9040                     | 0.8763 | 0.8447 | 0.8709 | 0.8457 | 0.8683           | 0.0246             |
|                                                              | IMD        | 0.7591                     | 0.7863 | 0.8035 | 0.8226 | 0.8672 | 0.8077           | 0.0406             |
|                                                              | Re         | 0.8664                     | 0.8464 | 0.8552 | 0.8489 | 0.8629 | 0.8560           | 0.0086             |
|                                                              | CM         | 0.8907                     | 0.9098 | 0.9098 | 0.8888 | 0.8833 | 0.8965           | 0.0125             |
|                                                              | PF         | 0.7937                     | 0.7919 | 0.8065 | 0.7772 | 0.7779 | 0.7894           | 0.0122             |
|                                                              | RT         | 0.7757                     | 0.8005 | 0.7339 | 0.7707 | 0.7397 | 0.7641           | 0.0274             |
| MHb                                                          | 0.6128     | 0.6410                     | 0.6651 | 0.6278 | 0.5983 | 0.6290 | 0.0258           |                    |
| LHb                                                          | 0.8065     | 0.8124                     | 0.7420 | 0.8065 | 0.7419 | 0.7819 | 0.0365           |                    |
| ZI                                                           | 0.7596     | 0.7580                     | 0.7797 | 0.7685 | 0.7340 | 0.7600 | 0.0169           |                    |
| SPF                                                          | 0.7866     | 0.7934                     | 0.8235 | 0.7939 | 0.7939 | 0.7983 | 0.0144           |                    |

| Position of seed voxel                                       | Seed voxel | Pearson correlation values |        |        |        |        | Mean correlation | Standard Deviation |
|--------------------------------------------------------------|------------|----------------------------|--------|--------|--------|--------|------------------|--------------------|
| <a href="http://map.org/agea?seed=P">map.org/agea?seed=P</a> | DLG        | 0.7359                     | 0.7786 | 0.7229 | 0.8288 | 0.8170 | 0.7766           | 0.0472             |
|                                                              | PG         | 0.8166                     | 0.8090 | 0.7844 | 0.7951 | 0.7869 | 0.7984           | 0.0140             |
|                                                              | MGN        | 0.7962                     | 0.7335 | 0.7805 | 0.7425 | 0.8279 | 0.7761           | 0.0389             |
|                                                              | VPL/VPM    | 0.8342                     | 0.8252 | 0.8378 | 0.8075 | 0.8107 | 0.8231           | 0.0136             |
|                                                              | VL/VA      | 0.8635                     | 0.8752 | 0.8619 | 0.8645 | 0.8169 | 0.8564           | 0.0227             |
|                                                              | VM         | 0.8241                     | 0.8266 | 0.8371 | 0.8478 | 0.8268 | 0.8325           | 0.0099             |
|                                                              | MD         | 0.8413                     | 0.8414 | 0.8722 | 0.8673 | 0.8587 | 0.8562           | 0.0144             |
|                                                              | LD         | 0.8472                     | 0.8486 | 0.8293 | 0.8240 | 0.7954 | 0.8289           | 0.0216             |
|                                                              | Po         | 0.8143                     | 0.8311 | 0.8163 | 0.8286 | 0.8428 | 0.8266           | 0.0117             |
|                                                              | AD         | 0.8786                     | 0.8786 | 0.8692 | 0.8380 | 0.8706 | 0.8670           | 0.0168             |
|                                                              | AM         | 0.8607                     | 0.9523 | 0.9385 | 0.8858 | 0.8830 | 0.9041           | 0.0393             |
|                                                              | AV         | 0.8744                     | 0.9764 | 0.9613 | 0.9339 | 0.9074 | 0.9307           | 0.0411             |
|                                                              | LP         | 0.7951                     | 0.8514 | 0.8514 | 0.8065 | 0.8089 | 0.8227           | 0.0267             |
|                                                              | PV         | 0.7641                     | 0.7874 | 0.8347 | 0.8451 | 0.8140 | 0.8091           | 0.0334             |
|                                                              | PT         | 0.7850                     | 0.7795 | 0.8581 | 0.8582 | 0.8118 | 0.8185           | 0.0382             |
|                                                              | IMD        | 0.8261                     | 0.8447 | 0.8518 | 0.8263 | 0.8369 | 0.8372           | 0.0113             |
|                                                              | Re         | 0.8517                     | 0.8398 | 0.8258 | 0.8026 | 0.8116 | 0.8263           | 0.0200             |
|                                                              | CM         | 0.8421                     | 0.8584 | 0.8571 | 0.8424 | 0.8249 | 0.8450           | 0.0136             |
|                                                              | PF         | 0.7735                     | 0.7973 | 0.7912 | 0.8035 | 0.8089 | 0.7949           | 0.0137             |
|                                                              | RT         | 0.8074                     | 0.8511 | 0.8107 | 0.8138 | 0.7403 | 0.8047           | 0.0401             |
| MHb                                                          | 0.6283     | 0.6670                     | 0.6753 | 0.6452 | 0.6386 | 0.6509 | 0.0197           |                    |
| LHb                                                          | 0.7474     | 0.7955                     | 0.8152 | 0.7467 | 0.7467 | 0.7703 | 0.0327           |                    |
| ZI                                                           | 0.7979     | 0.8032                     | 0.7785 | 0.7953 | 0.8022 | 0.7954 | 0.0100           |                    |
| SPF                                                          | 0.8220     | 0.7738                     | 0.7971 | 0.8121 | 0.7983 | 0.8007 | 0.0182           |                    |

| Position of seed voxel | Seed voxel | Pearson correlation values |        |        |        |        | Mean correlation | Standard Deviation |
|------------------------|------------|----------------------------|--------|--------|--------|--------|------------------|--------------------|
|                        | DLG        | 0.9206                     | 0.9070 | 0.9183 | 0.9034 | 0.8395 | 0.8978           | 0.0334             |
|                        | PG         | 0.7261                     | 0.7261 | 0.7623 | 0.7690 | 0.7846 | 0.7536           | 0.0264             |
|                        | MGN        | 0.9267                     | 0.9245 | 0.9149 | 0.9362 | 0.9015 | 0.9208           | 0.0132             |
|                        | VPL/VPM    | 0.8897                     | 0.8841 | 0.8702 | 0.8770 | 0.8850 | 0.8812           | 0.0076             |

|                                                              |       |        |        |        |        |        |        |        |
|--------------------------------------------------------------|-------|--------|--------|--------|--------|--------|--------|--------|
|                                                              | VL/VA | 0.8805 | 0.8754 | 0.8926 | 0.8794 | 0.7963 | 0.8648 | 0.0388 |
|                                                              | VM    | 0.9083 | 0.9053 | 0.8866 | 0.8947 | 0.8994 | 0.8989 | 0.0086 |
|                                                              | MD    | 0.9245 | 0.9330 | 0.8802 | 0.9282 | 0.9302 | 0.9192 | 0.0220 |
|                                                              | LD    | 0.9051 | 0.8965 | 0.9201 | 0.8974 | 0.8868 | 0.9012 | 0.0124 |
|                                                              | Po    | 0.9463 | 0.9547 | 0.9676 | 0.9542 | 0.9787 | 0.9603 | 0.0128 |
|                                                              | AD    | 0.7828 | 0.8088 | 0.7828 | 0.8391 | 0.7938 | 0.8015 | 0.0236 |
|                                                              | AM    | 0.8788 | 0.8829 | 0.8950 | 0.8925 | 0.9018 | 0.8902 | 0.0093 |
|                                                              | AV    | 0.8612 | 0.8899 | 0.9165 | 0.9152 | 0.9007 | 0.8967 | 0.0227 |
| <a href="http://map.org/agea?seed=P">map.org/agea?seed=P</a> | LP    | 0.9881 | 0.9900 | 1.0000 | 0.9724 | 0.9759 | 0.9853 | 0.0112 |
|                                                              | PV    | 0.8260 | 0.8163 | 0.8256 | 0.8312 | 0.8696 | 0.8337 | 0.0208 |
|                                                              | PT    | 0.7902 | 0.8457 | 0.8461 | 0.8461 | 0.8457 | 0.8348 | 0.0249 |
|                                                              | IMD   | 0.8977 | 0.9067 | 0.9025 | 0.8773 | 0.9032 | 0.8975 | 0.0117 |
|                                                              | Re    | 0.8287 | 0.8623 | 0.8287 | 0.8563 | 0.8291 | 0.8410 | 0.0168 |
|                                                              | CM    | 0.8627 | 0.8989 | 0.9093 | 0.9035 | 0.9208 | 0.8990 | 0.0219 |
|                                                              | PF    | 0.8405 | 0.8481 | 0.8007 | 0.8143 | 0.8043 | 0.8216 | 0.0215 |
|                                                              | RT    | 0.7519 | 0.7472 | 0.7644 | 0.7975 | 0.8000 | 0.7722 | 0.0251 |
|                                                              | MHb   | 0.4715 | 0.5271 | 0.5622 | 0.5815 | 0.5271 | 0.5339 | 0.0420 |
|                                                              | LHb   | 0.7319 | 0.7526 | 0.7577 | 0.7532 | 0.8379 | 0.7667 | 0.0411 |
|                                                              | ZI    | 0.7613 | 0.8034 | 0.7760 | 0.8032 | 0.7550 | 0.7798 | 0.0228 |
|                                                              | SPF   | 0.8239 | 0.9105 | 0.8695 | 0.8837 | 0.8837 | 0.8743 | 0.0318 |

| Position of seed voxel                                       | Seed voxel | Pearson correlation values |        |        |        |        | Mean correlation | Standard Deviation |
|--------------------------------------------------------------|------------|----------------------------|--------|--------|--------|--------|------------------|--------------------|
|                                                              | DLG        | 0.7927                     | 0.7775 | 0.8068 | 0.7821 | 0.7775 | 0.7873           | 0.0125             |
|                                                              | PG         | 0.8169                     | 0.8341 | 0.8452 | 0.8169 | 0.8099 | 0.8246           | 0.0146             |
|                                                              | MGN        | 0.8030                     | 0.7828 | 0.8115 | 0.8395 | 0.7485 | 0.7971           | 0.0339             |
|                                                              | VPL/VPM    | 0.7715                     | 0.7747 | 0.7579 | 0.7696 | 0.7491 | 0.7646           | 0.0107             |
|                                                              | VL/VA      | 0.8178                     | 0.8320 | 0.8320 | 0.8289 | 0.8405 | 0.8302           | 0.0082             |
|                                                              | VM         | 0.8842                     | 0.8679 | 0.8445 | 0.8330 | 0.8452 | 0.8550           | 0.0207             |
|                                                              | MD         | 0.8579                     | 0.8404 | 0.8662 | 0.8622 | 0.8567 | 0.8567           | 0.0098             |
|                                                              | LD         | 0.8386                     | 0.8309 | 0.8089 | 0.8101 | 0.8044 | 0.8186           | 0.0152             |
|                                                              | Po         | 0.7903                     | 0.8033 | 0.8643 | 0.7944 | 0.8077 | 0.8120           | 0.0300             |
|                                                              | AD         | 0.8243                     | 0.8194 | 0.8243 | 0.7975 | 0.8001 | 0.8131           | 0.0133             |
|                                                              | AM         | 0.8760                     | 0.8658 | 0.8384 | 0.8156 | 0.8087 | 0.8409           | 0.0297             |
|                                                              | AV         | 0.7914                     | 0.8081 | 0.8087 | 0.8004 | 0.7955 | 0.8008           | 0.0076             |
|                                                              | LP         | 0.8903                     | 0.8316 | 0.8622 | 0.8567 | 0.8343 | 0.8550           | 0.0239             |
| <a href="http://map.org/agea?seed=P">map.org/agea?seed=P</a> | PV         | 0.8475                     | 0.8680 | 0.9401 | 0.9691 | 0.9195 | 0.9088           | 0.0504             |
|                                                              | PT         | 0.8869                     | 0.8893 | 0.8912 | 0.8920 | 0.8510 | 0.8821           | 0.0175             |
|                                                              | IMD        | 0.8851                     | 0.9013 | 0.9273 | 0.9183 | 0.9121 | 0.9088           | 0.0163             |
|                                                              | Re         | 0.9010                     | 0.8957 | 0.8903 | 0.8906 | 0.9011 | 0.8957           | 0.0053             |
|                                                              | CM         | 0.8966                     | 0.9019 | 0.8592 | 0.8384 | 0.8410 | 0.8674           | 0.0302             |
|                                                              | PF         | 0.8842                     | 0.8618 | 0.8464 | 0.8814 | 0.8618 | 0.8671           | 0.0157             |
|                                                              | RT         | 0.7523                     | 0.7744 | 0.7934 | 0.7424 | 0.7708 | 0.7667           | 0.0199             |
|                                                              | MHb        | 0.7723                     | 0.7911 | 0.7109 | 0.7825 | 0.7402 | 0.7594           | 0.0333             |
|                                                              | LHb        | 0.8842                     | 0.9232 | 0.8674 | 0.8674 | 0.9165 | 0.8917           | 0.0267             |
|                                                              | ZI         | 0.8327                     | 0.8016 | 0.7941 | 0.8528 | 0.8442 | 0.8251           | 0.0260             |
|                                                              | SPF        | 0.9006                     | 0.8862 | 0.8909 | 0.8745 | 0.8584 | 0.8821           | 0.0162             |

| Position of seed voxel                                       | Seed voxel | Pearson correlation values |        |        |        |        | Mean correlation | Standard Deviation |
|--------------------------------------------------------------|------------|----------------------------|--------|--------|--------|--------|------------------|--------------------|
|                                                              | DLG        | 0.8151                     | 0.8260 | 0.8243 | 0.8336 | 0.8151 | 0.8228           | 0.0079             |
|                                                              | PG         | 0.8321                     | 0.8314 | 0.8162 | 0.8367 | 0.8162 | 0.8265           | 0.0096             |
|                                                              | MGN        | 0.7909                     | 0.8650 | 0.8210 | 0.7960 | 0.8421 | 0.8230           | 0.0312             |
|                                                              | VPL/VPM    | 0.7991                     | 0.8000 | 0.8095 | 0.8163 | 0.8035 | 0.8057           | 0.0072             |
|                                                              | VM/VAL     | 0.8733                     | 0.8379 | 0.8424 | 0.8632 | 0.8512 | 0.8536           | 0.0146             |
|                                                              | VM         | 0.8973                     | 0.8665 | 0.8671 | 0.8509 | 0.8680 | 0.8700           | 0.0168             |
|                                                              | MD         | 0.8749                     | 0.8698 | 0.8983 | 0.8747 | 0.9193 | 0.8874           | 0.0210             |
|                                                              | LD         | 0.8796                     | 0.8631 | 0.8620 | 0.8616 | 0.8959 | 0.8724           | 0.0151             |
|                                                              | Po         | 0.8423                     | 0.8508 | 0.8423 | 0.8508 | 0.8624 | 0.8497           | 0.0083             |
|                                                              | AD         | 0.8836                     | 0.8691 | 0.8405 | 0.8482 | 0.8836 | 0.8650           | 0.0199             |
|                                                              | AM         | 0.8727                     | 0.8938 | 0.8788 | 0.8610 | 0.8685 | 0.8750           | 0.0124             |
|                                                              | AV         | 0.8612                     | 0.8574 | 0.8587 | 0.8557 | 0.8612 | 0.8588           | 0.0024             |
|                                                              | LP         | 0.8675                     | 0.8784 | 0.8784 | 0.8675 | 0.8747 | 0.8733           | 0.0055             |
|                                                              | PV         | 0.9233                     | 0.9181 | 0.8763 | 0.8701 | 0.8515 | 0.8879           | 0.0314             |
| <a href="http://map.org/agea?seed=P">map.org/agea?seed=P</a> | PT         | 0.9919                     | 1.0000 | 0.9577 | 1.0000 | 1.0000 | 0.9899           | 0.0183             |
|                                                              | IMD        | 0.9170                     | 0.9121 | 0.9032 | 0.9121 | 0.9054 | 0.9100           | 0.0056             |
|                                                              | Re         | 0.9395                     | 0.9437 | 0.9311 | 0.9358 | 0.9027 | 0.9306           | 0.0163             |

|  |     |        |        |        |        |        |        |        |
|--|-----|--------|--------|--------|--------|--------|--------|--------|
|  | CM  | 0.9088 | 0.9027 | 0.8961 | 0.9203 | 0.9053 | 0.9066 | 0.0089 |
|  | PF  | 0.8476 | 0.8555 | 0.8642 | 0.8476 | 0.8724 | 0.8575 | 0.0108 |
|  | RT  | 0.8222 | 0.8526 | 0.7878 | 0.8119 | 0.7677 | 0.8084 | 0.0325 |
|  | MHb | 0.5275 | 0.6010 | 0.6302 | 0.6466 | 0.6083 | 0.6027 | 0.0458 |
|  | LHb | 0.7473 | 0.8109 | 0.8379 | 0.8216 | 0.8267 | 0.8089 | 0.0358 |
|  | ZI  | 0.8170 | 0.8052 | 0.8197 | 0.7975 | 0.7849 | 0.8049 | 0.0143 |
|  | SPF | 0.8412 | 0.8378 | 0.8465 | 0.8371 | 0.8389 | 0.8403 | 0.0038 |

| Position of seed voxel                                       | Seed voxel | Pearson correlation values |        |        |        |        | Mean correlation | Standard Deviation |
|--------------------------------------------------------------|------------|----------------------------|--------|--------|--------|--------|------------------|--------------------|
|                                                              | DLG        | 0.8847                     | 0.8751 | 0.8735 | 0.8847 | 0.8689 | 0.8774           | 0.0071             |
|                                                              | PG         | 0.8080                     | 0.7365 | 0.7939 | 0.7854 | 0.8023 | 0.7852           | 0.0285             |
|                                                              | MGN        | 0.8739                     | 0.8411 | 0.8411 | 0.8197 | 0.8342 | 0.8420           | 0.0199             |
|                                                              | VPL/VPM    | 0.8732                     | 0.8625 | 0.8734 | 0.8593 | 0.8579 | 0.8653           | 0.0075             |
|                                                              | VM/VAL     | 0.8523                     | 0.9215 | 0.9118 | 0.8920 | 0.9106 | 0.8976           | 0.0275             |
|                                                              | VM         | 0.9139                     | 0.9094 | 0.9225 | 0.8929 | 0.9079 | 0.9093           | 0.0108             |
|                                                              | MD         | 0.9784                     | 0.9784 | 0.9683 | 0.9917 | 0.9753 | 0.9784           | 0.0085             |
|                                                              | LD         | 0.9034                     | 0.8879 | 0.8758 | 0.8710 | 0.8859 | 0.8848           | 0.0125             |
|                                                              | Po         | 0.9157                     | 0.9169 | 0.8855 | 0.9221 | 0.9179 | 0.9116           | 0.0148             |
|                                                              | AD         | 0.8527                     | 0.8252 | 0.8715 | 0.8527 | 0.8252 | 0.8455           | 0.0200             |
|                                                              | AM         | 0.9028                     | 0.8872 | 0.9095 | 0.9228 | 0.9004 | 0.9045           | 0.0130             |
|                                                              | AV         | 0.8649                     | 0.9227 | 0.8979 | 0.8906 | 0.8990 | 0.8950           | 0.0207             |
|                                                              | LP         | 0.8954                     | 0.8820 | 0.9229 | 0.8976 | 0.9047 | 0.9005           | 0.0150             |
|                                                              | PV         | 0.7703                     | 0.8054 | 0.7573 | 0.8917 | 0.8642 | 0.8178           | 0.0585             |
|                                                              | PT         | 0.8436                     | 0.8362 | 0.8436 | 0.9146 | 0.9068 | 0.8690           | 0.0383             |
| <a href="http://map.org/agea?seed=P">map.org/agea?seed=P</a> | IMD        | 0.9937                     | 0.9828 | 0.9524 | 0.9077 | 0.8328 | 0.9339           | 0.0656             |
|                                                              | Re         | 0.8811                     | 0.8928 | 0.9050 | 0.8811 | 0.9013 | 0.8923           | 0.0111             |
|                                                              | CM         | 0.9629                     | 0.9562 | 0.9747 | 0.9851 | 0.9670 | 0.9692           | 0.0111             |
|                                                              | PF         | 0.8227                     | 0.8363 | 0.8224 | 0.8307 | 0.8224 | 0.8269           | 0.0063             |
|                                                              | RT         | 0.7702                     | 0.7957 | 0.7651 | 0.7889 | 0.8136 | 0.7867           | 0.0197             |
|                                                              | MHb        | 0.4966                     | 0.5663 | 0.6018 | 0.6176 | 0.5689 | 0.5702           | 0.0466             |
|                                                              | LHb        | 0.7916                     | 0.7882 | 0.7882 | 0.7251 | 0.7849 | 0.7756           | 0.0283             |
|                                                              | ZI         | 0.8028                     | 0.7654 | 0.7598 | 0.7504 | 0.7535 | 0.7664           | 0.0212             |
|                                                              | SPF        | 0.8307                     | 0.8503 | 0.8856 | 0.8484 | 0.8430 | 0.8516           | 0.0205             |

| Position of seed voxel                                       | Seed voxel | Pearson correlation values |        |        |        |        | Mean correlation | Standard Deviation |
|--------------------------------------------------------------|------------|----------------------------|--------|--------|--------|--------|------------------|--------------------|
|                                                              | DLG        | 0.8417                     | 0.8345 | 0.8398 | 0.8318 | 0.8336 | 0.8363           | 0.0042             |
|                                                              | PG         | 0.8105                     | 0.8112 | 0.7829 | 0.8005 | 0.7843 | 0.7979           | 0.0137             |
|                                                              | MGN        | 0.8515                     | 0.8602 | 0.8307 | 0.8322 | 0.8387 | 0.8427           | 0.0128             |
|                                                              | VPL/VPM    | 0.8603                     | 0.8694 | 0.8266 | 0.8191 | 0.8231 | 0.8397           | 0.0233             |
|                                                              | VM/VAL     | 0.8332                     | 0.8761 | 0.8611 | 0.8485 | 0.8261 | 0.8490           | 0.0203             |
|                                                              | VM         | 0.9638                     | 0.9289 | 0.8955 | 0.9010 | 0.9193 | 0.9217           | 0.0271             |
|                                                              | MD         | 0.9310                     | 0.9296 | 0.9268 | 0.8950 | 0.8865 | 0.9138           | 0.0213             |
|                                                              | LD         | 0.8880                     | 0.8617 | 0.8784 | 0.8616 | 0.8395 | 0.8658           | 0.0186             |
|                                                              | Po         | 0.8750                     | 0.8717 | 0.8754 | 0.8412 | 0.8643 | 0.8655           | 0.0143             |
|                                                              | AD         | 0.7860                     | 0.8091 | 0.8091 | 0.8448 | 0.8219 | 0.8142           | 0.0215             |
|                                                              | AM         | 0.8692                     | 0.8965 | 0.8920 | 0.8740 | 0.9059 | 0.8875           | 0.0155             |
|                                                              | AV         | 0.8266                     | 0.8459 | 0.8765 | 0.8795 | 0.7488 | 0.8355           | 0.0532             |
|                                                              | LP         | 0.8967                     | 0.8776 | 0.8529 | 0.8621 | 0.8776 | 0.8734           | 0.0168             |
|                                                              | PV         | 0.8207                     | 0.8390 | 0.8541 | 0.9173 | 0.8769 | 0.8616           | 0.0373             |
|                                                              | PT         | 0.8545                     | 0.8756 | 0.8573 | 0.8706 | 0.8545 | 0.8625           | 0.0099             |
|                                                              | IMD        | 0.9077                     | 0.9025 | 0.9108 | 0.8988 | 0.9038 | 0.9047           | 0.0047             |
| <a href="http://map.org/agea?seed=P">map.org/agea?seed=P</a> | Re         | 0.8998                     | 0.9517 | 0.9618 | 0.9419 | 0.9314 | 0.9373           | 0.0238             |
|                                                              | CM         | 0.9042                     | 0.9020 | 0.9020 | 0.9083 | 0.9293 | 0.9092           | 0.0115             |
|                                                              | PF         | 0.8598                     | 0.8466 | 0.8414 | 0.8557 | 0.8466 | 0.8500           | 0.0075             |
|                                                              | RT         | 0.7460                     | 0.7863 | 0.7540 | 0.7888 | 0.7306 | 0.7611           | 0.0255             |
|                                                              | MHb        | 0.6530                     | 0.7070 | 0.7323 | 0.7042 | 0.7173 | 0.7028           | 0.0299             |
|                                                              | LHb        | 0.8814                     | 0.8525 | 0.8051 | 0.7800 | 0.8795 | 0.8397           | 0.0454             |
|                                                              | ZI         | 0.8818                     | 0.8715 | 0.8735 | 0.8159 | 0.7547 | 0.8395           | 0.0541             |
|                                                              | SPF        | 0.8633                     | 0.8840 | 0.8758 | 0.8597 | 0.8864 | 0.8738           | 0.0120             |

| Position of seed voxel | Seed voxel | Pearson correlation values |        |        |        |        | Mean correlation | Standard Deviation |
|------------------------|------------|----------------------------|--------|--------|--------|--------|------------------|--------------------|
|                        | DLG        | 0.8642                     | 0.8749 | 0.8744 | 0.8769 | 0.8826 | 0.8746           | 0.0067             |
|                        | PG         | 0.7698                     | 0.8080 | 0.7854 | 0.7857 | 0.7939 | 0.7886           | 0.0139             |
|                        | MGN        | 0.8460                     | 0.8473 | 0.8674 | 0.8791 | 0.7514 | 0.8382           | 0.0505             |

|                                                              |         |        |        |        |        |        |        |        |
|--------------------------------------------------------------|---------|--------|--------|--------|--------|--------|--------|--------|
|                                                              | VPL/VPM | 0.8732 | 0.8668 | 0.8782 | 0.8850 | 0.8699 | 0.8746 | 0.0072 |
|                                                              | VM/VAL  | 0.8810 | 0.9106 | 0.9068 | 0.8842 | 0.8920 | 0.8949 | 0.0133 |
|                                                              | VM      | 0.9094 | 0.9225 | 0.9164 | 0.9252 | 0.9036 | 0.9154 | 0.0090 |
|                                                              | MD      | 0.9784 | 0.9784 | 0.9651 | 0.9917 | 0.9683 | 0.9764 | 0.0104 |
|                                                              | LD      | 0.8752 | 0.8965 | 0.8820 | 0.8879 | 0.8758 | 0.8835 | 0.0089 |
|                                                              | Po      | 0.8844 | 0.8855 | 0.9169 | 0.9221 | 0.9179 | 0.9054 | 0.0187 |
|                                                              | AD      | 0.8252 | 0.8166 | 0.8527 | 0.7503 | 0.8252 | 0.8140 | 0.0381 |
|                                                              | AM      | 0.9037 | 0.9028 | 0.9194 | 0.9281 | 0.9194 | 0.9147 | 0.0110 |
|                                                              | AV      | 0.8774 | 0.8653 | 0.8730 | 0.8939 | 0.8990 | 0.8817 | 0.0142 |
|                                                              | LP      | 0.8900 | 0.8976 | 0.8820 | 0.8954 | 0.9030 | 0.8936 | 0.0080 |
|                                                              | PV      | 0.7703 | 0.7545 | 0.7573 | 0.8762 | 0.8811 | 0.8079 | 0.0649 |
|                                                              | PT      | 0.8436 | 0.8362 | 0.8958 | 0.8958 | 0.9068 | 0.8756 | 0.0330 |
|                                                              | IMD     | 0.9503 | 0.9766 | 0.9868 | 1.0000 | 0.9714 | 0.9770 | 0.0185 |
|                                                              | Re      | 0.8811 | 0.8928 | 0.9156 | 0.9142 | 0.9013 | 0.9010 | 0.0146 |
| <a href="http://map.org/agea?seed=P">map.org/agea?seed=P</a> | CM      | 1.0000 | 0.9670 | 0.9660 | 0.9851 | 0.9747 | 0.9786 | 0.0142 |
|                                                              | PF      | 0.8728 | 0.8700 | 0.8769 | 0.8307 | 0.8224 | 0.8546 | 0.0259 |
|                                                              | RT      | 0.8498 | 0.8389 | 0.7789 | 0.8046 | 0.8230 | 0.8190 | 0.0282 |
|                                                              | MHb     | 0.4966 | 0.5663 | 0.6018 | 0.6176 | 0.6686 | 0.5902 | 0.0640 |
|                                                              | LHb     | 0.8474 | 0.8708 | 0.8686 | 0.8507 | 0.7936 | 0.8462 | 0.0312 |
|                                                              | ZI      | 0.7801 | 0.8028 | 0.7705 | 0.7542 | 0.7634 | 0.7742 | 0.0186 |
|                                                              | SPF     | 0.8176 | 0.8172 | 0.8173 | 0.8477 | 0.8225 | 0.8245 | 0.0132 |

| Position of seed voxel                                       | Seed voxel | Pearson correlation values |        |        |        |        | Mean correlation | Standard Deviation |
|--------------------------------------------------------------|------------|----------------------------|--------|--------|--------|--------|------------------|--------------------|
|                                                              | DLG        | 0.8005                     | 0.8426 | 0.8226 | 0.8348 | 0.8129 | 0.8227           | 0.0168             |
|                                                              | PG         | 0.8519                     | 0.8600 | 0.8426 | 0.7245 | 0.8599 | 0.8278           | 0.0582             |
|                                                              | MGN        | 0.7228                     | 0.8563 | 0.6053 | 0.7709 | 0.7704 | 0.7451           | 0.0918             |
|                                                              | VPL/VPM    | 0.7969                     | 0.8186 | 0.7910 | 0.7863 | 0.7915 | 0.7969           | 0.0127             |
|                                                              | VM/VAL     | 0.8405                     | 0.8264 | 0.8092 | 0.8097 | 0.8182 | 0.8208           | 0.0131             |
|                                                              | VM         | 0.8471                     | 0.8599 | 0.8343 | 0.8803 | 0.8561 | 0.8555           | 0.0170             |
|                                                              | MD         | 0.8173                     | 0.8427 | 0.8390 | 0.8547 | 0.8308 | 0.8369           | 0.0139             |
|                                                              | LD         | 0.8245                     | 0.8348 | 0.8329 | 0.8095 | 0.8080 | 0.8219           | 0.0127             |
|                                                              | Po         | 0.8415                     | 0.8518 | 0.8397 | 0.8071 | 0.7940 | 0.8268           | 0.0249             |
|                                                              | AD         | 0.7853                     | 0.7578 | 0.8318 | 0.8318 | 0.7850 | 0.7983           | 0.0325             |
|                                                              | AM         | 0.7833                     | 0.7924 | 0.8137 | 0.8043 | 0.7998 | 0.7987           | 0.0116             |
|                                                              | AV         | 0.7633                     | 0.7975 | 0.7529 | 0.7850 | 0.8079 | 0.7813           | 0.0230             |
|                                                              | LP         | 0.8620                     | 0.8389 | 0.7924 | 0.8014 | 0.8209 | 0.8231           | 0.0282             |
|                                                              | PV         | 0.7575                     | 0.7440 | 0.7336 | 0.7989 | 0.8474 | 0.7763           | 0.0469             |
|                                                              | PT         | 0.7779                     | 0.7979 | 0.8136 | 0.8074 | 0.7806 | 0.7955           | 0.0159             |
|                                                              | IMD        | 0.8299                     | 0.8257 | 0.8389 | 0.8426 | 0.8561 | 0.8386           | 0.0119             |
|                                                              | Re         | 0.8025                     | 0.8409 | 0.8559 | 0.8609 | 0.8441 | 0.8409           | 0.0230             |
|                                                              | CM         | 0.8385                     | 0.8488 | 0.8457 | 0.8557 | 0.8860 | 0.8549           | 0.0184             |
| <a href="http://map.org/agea?seed=P">map.org/agea?seed=P</a> | PF         | 0.9393                     | 0.9460 | 0.9815 | 0.9858 | 0.9650 | 0.9635           | 0.0207             |
|                                                              | RT         | 0.7455                     | 0.7951 | 0.7323 | 0.8009 | 0.7723 | 0.7692           | 0.0300             |
|                                                              | MHb        | 0.6498                     | 0.7005 | 0.7334 | 0.6899 | 0.6828 | 0.6913           | 0.0302             |
|                                                              | LHb        | 0.8747                     | 0.8995 | 0.8655 | 0.7979 | 0.7664 | 0.8408           | 0.0561             |
|                                                              | ZI         | 0.8314                     | 0.8479 | 0.8627 | 0.8454 | 0.8033 | 0.8381           | 0.0224             |
|                                                              | SPF        | 0.8984                     | 0.9265 | 0.8901 | 0.8854 | 0.8594 | 0.8920           | 0.0242             |

| Position of seed voxel | Seed voxel | Pearson correlation values |        |        |        |        | Mean correlation | Standard Deviation |
|------------------------|------------|----------------------------|--------|--------|--------|--------|------------------|--------------------|
|                        | DLG        | 0.7946                     | 0.7876 | 0.8093 | 0.8162 | 0.8298 | 0.8075           | 0.0169             |
|                        | PG         | 0.8789                     | 0.8730 | 0.8857 | 0.8600 | 0.8723 | 0.8740           | 0.0095             |
|                        | MGN        | 0.7322                     | 0.7077 | 0.7730 | 0.7223 | 0.7960 | 0.7462           | 0.0369             |
|                        | VPL/VPM    | 0.8216                     | 0.8013 | 0.8185 | 0.8401 | 0.8206 | 0.8204           | 0.0138             |
|                        | VM/VAL     | 0.8128                     | 0.8342 | 0.8498 | 0.8416 | 0.8325 | 0.8342           | 0.0138             |
|                        | VM         | 0.8087                     | 0.7833 | 0.8572 | 0.8098 | 0.8461 | 0.8210           | 0.0302             |
|                        | MD         | 0.8046                     | 0.8122 | 0.8222 | 0.8106 | 0.8188 | 0.8137           | 0.0069             |
|                        | LD         | 0.8250                     | 0.8308 | 0.8033 | 0.8198 | 0.8120 | 0.8182           | 0.0108             |
|                        | Po         | 0.7873                     | 0.7682 | 0.7833 | 0.7717 | 0.7898 | 0.7801           | 0.0096             |
|                        | AD         | 0.8160                     | 0.8090 | 0.8160 | 0.8126 | 0.8126 | 0.8132           | 0.0029             |
|                        | AM         | 0.7699                     | 0.8264 | 0.7742 | 0.7593 | 0.7972 | 0.7854           | 0.0268             |
|                        | AV         | 0.7753                     | 0.8646 | 0.8230 | 0.7973 | 0.8230 | 0.8166           | 0.0334             |
|                        | LP         | 0.7892                     | 0.7775 | 0.7764 | 0.7786 | 0.7764 | 0.7796           | 0.0054             |
|                        | PV         | 0.7538                     | 0.7621 | 0.7566 | 0.7423 | 0.7266 | 0.7483           | 0.0141             |
|                        | PT         | 0.7687                     | 0.7734 | 0.7734 | 0.7814 | 0.7565 | 0.7707           | 0.0091             |
|                        | IMD        | 0.7628                     | 0.7628 | 0.7740 | 0.7776 | 0.7682 | 0.7691           | 0.0066             |



|                                                              |     |        |        |        |        |        |        |        |
|--------------------------------------------------------------|-----|--------|--------|--------|--------|--------|--------|--------|
| <a href="http://map.org/agea?seed=P">map.org/agea?seed=P</a> | Re  | 0.7672 | 0.7483 | 0.7571 | 0.7799 | 0.7847 | 0.7674 | 0.0152 |
|                                                              | CM  | 0.7781 | 0.7662 | 0.7651 | 0.7738 | 0.7781 | 0.7723 | 0.0063 |
|                                                              | PF  | 0.7961 | 0.7991 | 0.7911 | 0.7704 | 0.7880 | 0.7889 | 0.0112 |
|                                                              | RT  | 0.8896 | 0.9507 | 0.9600 | 0.9918 | 0.9234 | 0.9431 | 0.0386 |
|                                                              | MHb | 0.5693 | 0.6106 | 0.6130 | 0.6320 | 0.6710 | 0.6192 | 0.0369 |
|                                                              | LHb | 0.8384 | 0.8422 | 0.8273 | 0.8213 | 0.8248 | 0.8308 | 0.0090 |
|                                                              | ZI  | 0.8753 | 0.8848 | 0.8698 | 0.8769 | 0.8807 | 0.8775 | 0.0057 |
|                                                              | SPF | 0.7650 | 0.7876 | 0.7962 | 0.8182 | 0.8264 | 0.7987 | 0.0246 |

| Position of seed voxel                                       | Seed voxel | Pearson correlation values |        |        |        |        | Mean correlation | Standard Deviation |
|--------------------------------------------------------------|------------|----------------------------|--------|--------|--------|--------|------------------|--------------------|
| <a href="http://map.org/agea?seed=P">map.org/agea?seed=P</a> | DLG        | 0.5584                     | 0.5788 | 0.5648 | 0.5692 | 0.5488 | 0.5640           | 0.0113             |
|                                                              | PG         | 0.6431                     | 0.6428 | 0.6324 | 0.6436 | 0.6276 | 0.6379           | 0.0074             |
|                                                              | MGN        | 0.5503                     | 0.6123 | 0.5318 | 0.5467 | 0.5141 | 0.5510           | 0.0371             |
|                                                              | VPL/VPM    | 0.5554                     | 0.5553 | 0.5387 | 0.5443 | 0.5628 | 0.5513           | 0.0097             |
|                                                              | VM/VAL     | 0.5731                     | 0.5933 | 0.6129 | 0.5718 | 0.5686 | 0.5839           | 0.0189             |
|                                                              | VM         | 0.6584                     | 0.5712 | 0.5886 | 0.6073 | 0.5780 | 0.6007           | 0.0350             |
|                                                              | MD         | 0.5961                     | 0.5865 | 0.5787 | 0.5766 | 0.5806 | 0.5837           | 0.0079             |
|                                                              | LD         | 0.6061                     | 0.6116 | 0.6148 | 0.5944 | 0.6122 | 0.6078           | 0.0081             |
|                                                              | Po         | 0.5916                     | 0.5446 | 0.6261 | 0.6173 | 0.5516 | 0.5862           | 0.0371             |
|                                                              | AD         | 0.6289                     | 0.6162 | 0.6419 | 0.6617 | 0.6289 | 0.6355           | 0.0172             |
|                                                              | AM         | 0.5830                     | 0.5519 | 0.5538 | 0.5554 | 0.5538 | 0.5596           | 0.0132             |
|                                                              | AV         | 0.6092                     | 0.5817 | 0.6092 | 0.5563 | 0.5763 | 0.5865           | 0.0227             |
|                                                              | LP         | 0.5996                     | 0.5712 | 0.6350 | 0.5625 | 0.5468 | 0.5830           | 0.0348             |
|                                                              | PV         | 0.6634                     | 0.6782 | 0.6733 | 0.7071 | 0.7112 | 0.6866           | 0.0213             |
|                                                              | PT         | 0.6302                     | 0.6375 | 0.6302 | 0.6361 | 0.6302 | 0.6328           | 0.0036             |
|                                                              | IMD        | 0.6050                     | 0.6252 | 0.5991 | 0.5904 | 0.6130 | 0.6065           | 0.0133             |
|                                                              | Re         | 0.6266                     | 0.6277 | 0.6398 | 0.6196 | 0.6256 | 0.6279           | 0.0074             |
|                                                              | CM         | 0.6077                     | 0.6003 | 0.5934 | 0.5798 | 0.5854 | 0.5933           | 0.0112             |
|                                                              | PF         | 0.6157                     | 0.6429 | 0.6550 | 0.6353 | 0.6429 | 0.6384           | 0.0145             |
|                                                              | RT         | 0.6081                     | 0.6152 | 0.6130 | 0.6072 | 0.6023 | 0.6092           | 0.0051             |
| MHb                                                          | 0.8147     | 0.9575                     | 0.9020 | 0.9723 | 0.9249 | 0.9143 | 0.0621           |                    |
| LHb                                                          | 0.7897     | 0.7732                     | 0.6994 | 0.7283 | 0.7305 | 0.7442 | 0.0366           |                    |
| ZI                                                           | 0.6171     | 0.6154                     | 0.6093 | 0.6135 | 0.6200 | 0.6151 | 0.0040           |                    |
| SPF                                                          | 0.7167     | 0.6700                     | 0.6488 | 0.6531 | 0.6726 | 0.6722 | 0.0269           |                    |

| Position of seed voxel                                       | Seed voxel | Pearson correlation values |        |        |        |        | Mean correlation | Standard Deviation |
|--------------------------------------------------------------|------------|----------------------------|--------|--------|--------|--------|------------------|--------------------|
| <a href="http://map.org/agea?seed=P">map.org/agea?seed=P</a> | DLG        | 0.7714                     | 0.7603 | 0.7418 | 0.7731 | 0.7463 | 0.7586           | 0.0142             |
|                                                              | PG         | 0.8167                     | 0.8125 | 0.8259 | 0.8223 | 0.8228 | 0.8200           | 0.0054             |
|                                                              | MGN        | 0.7416                     | 0.8057 | 0.8057 | 0.8490 | 0.7185 | 0.7841           | 0.0530             |
|                                                              | VPL/VPM    | 0.7939                     | 0.7703 | 0.7490 | 0.7376 | 0.7483 | 0.7598           | 0.0224             |
|                                                              | VM/VAL     | 0.7978                     | 0.7890 | 0.7601 | 0.7650 | 0.7564 | 0.7737           | 0.0185             |
|                                                              | VM         | 0.7744                     | 0.8735 | 0.8019 | 0.8337 | 0.8040 | 0.8175           | 0.0377             |
|                                                              | MD         | 0.7792                     | 0.7631 | 0.7652 | 0.7689 | 0.7630 | 0.7679           | 0.0068             |
|                                                              | LD         | 0.7982                     | 0.8007 | 0.8007 | 0.7789 | 0.7989 | 0.7955           | 0.0093             |
|                                                              | Po         | 0.8323                     | 0.7901 | 0.8034 | 0.7620 | 0.7466 | 0.7869           | 0.0339             |
|                                                              | AD         | 0.7864                     | 0.7987 | 0.7932 | 0.8056 | 0.8056 | 0.7979           | 0.0083             |
|                                                              | AM         | 0.7919                     | 0.7693 | 0.8293 | 0.7315 | 0.7331 | 0.7710           | 0.0413             |
|                                                              | AV         | 0.7388                     | 0.7900 | 0.7790 | 0.7376 | 0.7746 | 0.7640           | 0.0242             |
|                                                              | LP         | 0.8348                     | 0.8011 | 0.7870 | 0.8348 | 0.8523 | 0.8220           | 0.0270             |
|                                                              | PV         | 0.7868                     | 0.7789 | 0.7870 | 0.8791 | 0.8342 | 0.8132           | 0.0428             |
|                                                              | PT         | 0.8450                     | 0.8321 | 0.8216 | 0.8216 | 0.8240 | 0.8289           | 0.0100             |
|                                                              | IMD        | 0.7849                     | 0.7890 | 0.7952 | 0.8056 | 0.7946 | 0.7939           | 0.0078             |
|                                                              | Re         | 0.8459                     | 0.8215 | 0.8198 | 0.8245 | 0.7862 | 0.8196           | 0.0214             |
|                                                              | CM         | 0.7934                     | 0.7776 | 0.8319 | 0.8151 | 0.8298 | 0.8096           | 0.0236             |
|                                                              | PF         | 0.8275                     | 0.7935 | 0.8615 | 0.8123 | 0.8456 | 0.8281           | 0.0268             |
|                                                              | RT         | 0.7864                     | 0.8113 | 0.7846 | 0.8099 | 0.7675 | 0.7919           | 0.0186             |
| MHb                                                          | 0.8074     | 0.8629                     | 0.7732 | 0.8015 | 0.8227 | 0.8135 | 0.0329           |                    |
| LHb                                                          | 0.9067     | 0.9194                     | 0.9434 | 1.0000 | 0.9634 | 0.9466 | 0.0370           |                    |
| ZI                                                           | 0.8298     | 0.8385                     | 0.8264 | 0.8237 | 0.8404 | 0.8318 | 0.0074           |                    |
| SPF                                                          | 0.8302     | 0.8005                     | 0.8334 | 0.8190 | 0.8140 | 0.8194 | 0.0132           |                    |

| Position of seed voxel                                       | Seed voxel | Pearson correlation values |        |        |        |        | Mean correlation | Standard Deviation |
|--------------------------------------------------------------|------------|----------------------------|--------|--------|--------|--------|------------------|--------------------|
| <a href="http://map.org/agea?seed=P">map.org/agea?seed=P</a> | DLG        | 0.7854                     | 0.7748 | 0.7820 | 0.7913 | 0.7800 | 0.7827           | 0.0062             |
|                                                              | PG         | 0.9480                     | 0.9032 | 0.8715 | 0.9320 | 0.8448 | 0.8999           | 0.0424             |

|                                                              |         |        |        |        |        |        |        |        |
|--------------------------------------------------------------|---------|--------|--------|--------|--------|--------|--------|--------|
|                                                              | MGN     | 0.7591 | 0.8305 | 0.7162 | 0.7016 | 0.7135 | 0.7442 | 0.0529 |
|                                                              | VPL/VPM | 0.7812 | 0.7797 | 0.7805 | 0.7830 | 0.7747 | 0.7798 | 0.0031 |
|                                                              | VM/VAL  | 0.7659 | 0.7372 | 0.7852 | 0.7722 | 0.7752 | 0.7671 | 0.0181 |
|                                                              | VM      | 0.7813 | 0.7633 | 0.7396 | 0.7760 | 0.7657 | 0.7652 | 0.0161 |
|                                                              | MD      | 0.7687 | 0.7810 | 0.7720 | 0.7683 | 0.7671 | 0.7714 | 0.0057 |
|                                                              | LD      | 0.7826 | 0.8027 | 0.7943 | 0.7987 | 0.7925 | 0.7942 | 0.0076 |
|                                                              | Po      | 0.8172 | 0.7552 | 0.7932 | 0.7617 | 0.8146 | 0.7884 | 0.0290 |
|                                                              | AD      | 0.8201 | 0.8109 | 0.8201 | 0.8097 | 0.8055 | 0.8133 | 0.0066 |
|                                                              | AM      | 0.7579 | 0.7608 | 0.7330 | 0.7350 | 0.7741 | 0.7522 | 0.0177 |
|                                                              | AV      | 0.7925 | 0.7483 | 0.7908 | 0.7483 | 0.7299 | 0.7620 | 0.0281 |
|                                                              | LP      | 0.7724 | 0.7823 | 0.7630 | 0.7837 | 0.7661 | 0.7735 | 0.0093 |
|                                                              | PV      | 0.7741 | 0.7707 | 0.7710 | 0.8231 | 0.7875 | 0.7853 | 0.0222 |
|                                                              | PT      | 0.7941 | 0.8053 | 0.8069 | 0.7966 | 0.7749 | 0.7956 | 0.0128 |
|                                                              | IMD     | 0.7669 | 0.7705 | 0.7666 | 0.7687 | 0.7725 | 0.7690 | 0.0025 |
|                                                              | Re      | 0.7828 | 0.7798 | 0.7895 | 0.7802 | 0.7895 | 0.7844 | 0.0048 |
|                                                              | CM      | 0.7722 | 0.7740 | 0.7722 | 0.7776 | 0.7755 | 0.7743 | 0.0023 |
|                                                              | PF      | 0.8353 | 0.8445 | 0.8732 | 0.8605 | 0.8409 | 0.8509 | 0.0156 |
|                                                              | RT      | 0.8346 | 0.8680 | 0.8702 | 0.8638 | 0.8498 | 0.8573 | 0.0150 |
|                                                              | MHb     | 0.5430 | 0.5986 | 0.6187 | 0.6372 | 0.6510 | 0.6097 | 0.0422 |
|                                                              | LHb     | 0.8192 | 0.8349 | 0.8544 | 0.8722 | 0.8296 | 0.8421 | 0.0212 |
| <a href="http://map.org/agea?seed=P">map.org/agea?seed=P</a> | ZI      | 0.9417 | 0.9731 | 0.8983 | 0.9199 | 0.9651 | 0.9396 | 0.0311 |
|                                                              | SPF     | 0.8765 | 0.8992 | 0.8971 | 0.9030 | 0.9220 | 0.8996 | 0.0162 |

| Position of seed voxel                                       | Seed voxel | Pearson correlation values |        |        |        |        | Mean correlation | Standard Deviation |
|--------------------------------------------------------------|------------|----------------------------|--------|--------|--------|--------|------------------|--------------------|
|                                                              | DLG        | 0.8341                     | 0.8278 | 0.8692 | 0.8602 | 0.8615 | 0.8506           | 0.0184             |
|                                                              | PG         | 0.8643                     | 0.9125 | 0.9151 | 0.8451 | 0.9125 | 0.8899           | 0.0329             |
|                                                              | MGN        | 0.8497                     | 0.8642 | 0.8309 | 0.8725 | 0.8295 | 0.8494           | 0.0193             |
|                                                              | VPL/VPM    | 0.8213                     | 0.8034 | 0.7997 | 0.8203 | 0.8306 | 0.8151           | 0.0130             |
|                                                              | VM/VAL     | 0.8491                     | 0.8626 | 0.8605 | 0.8059 | 0.8216 | 0.8399           | 0.0251             |
|                                                              | VM         | 0.8722                     | 0.8730 | 0.9037 | 0.9238 | 0.8828 | 0.8911           | 0.0223             |
|                                                              | MD         | 0.8477                     | 0.8516 | 0.8570 | 0.8864 | 0.8543 | 0.8594           | 0.0155             |
|                                                              | LD         | 0.8103                     | 0.8381 | 0.8291 | 0.8335 | 0.8426 | 0.8307           | 0.0125             |
|                                                              | Po         | 0.8757                     | 0.8371 | 0.8436 | 0.8302 | 0.8429 | 0.8459           | 0.0175             |
|                                                              | AD         | 0.7942                     | 0.8144 | 0.7986 | 0.8111 | 0.7986 | 0.8034           | 0.0088             |
|                                                              | AM         | 0.8467                     | 0.8107 | 0.8317 | 0.8457 | 0.8256 | 0.8321           | 0.0150             |
|                                                              | AV         | 0.8269                     | 0.8338 | 0.7867 | 0.8121 | 0.8063 | 0.8132           | 0.0185             |
|                                                              | LP         | 0.8837                     | 0.8406 | 0.9007 | 0.9333 | 0.8939 | 0.8904           | 0.0335             |
|                                                              | PV         | 0.8480                     | 0.7562 | 0.8186 | 0.8073 | 0.8363 | 0.8133           | 0.0356             |
|                                                              | PT         | 0.8404                     | 0.8438 | 0.8465 | 0.8334 | 0.8347 | 0.8398           | 0.0057             |
|                                                              | IMD        | 0.8323                     | 0.8323 | 0.8387 | 0.8479 | 0.8484 | 0.8399           | 0.0080             |
|                                                              | Re         | 0.8777                     | 0.8960 | 0.8671 | 0.8703 | 0.8642 | 0.8751           | 0.0127             |
|                                                              | CM         | 0.8505                     | 0.8439 | 0.8606 | 0.8533 | 0.8592 | 0.8535           | 0.0068             |
|                                                              | PF         | 0.8770                     | 0.8866 | 0.8939 | 0.8801 | 0.8766 | 0.8828           | 0.0074             |
|                                                              | RT         | 0.8793                     | 0.8562 | 0.8210 | 0.7818 | 0.7959 | 0.8268           | 0.0407             |
|                                                              | MHb        | 0.6668                     | 0.7049 | 0.7380 | 0.6919 | 0.7094 | 0.7022           | 0.0260             |
|                                                              | LHb        | 0.8429                     | 0.8190 | 0.8799 | 0.8578 | 0.9135 | 0.8626           | 0.0361             |
| <a href="http://map.org/agea?seed=P">map.org/agea?seed=P</a> | ZI         | 0.9497                     | 0.9096 | 0.9077 | 0.9007 | 0.8976 | 0.9131           | 0.0211             |
|                                                              | SPF        | 0.9037                     | 0.9512 | 0.9866 | 0.9899 | 0.9745 | 0.9612           | 0.0355             |

## Mean correlation

|         | DLG    | PG     | MGN    | VPL/VPI | VAVL   | VM     | MD     | LD     | Po     | AD     | AM     | AV     | LP     | PV     | PT     | IMD    | Re     | CM     | PF     | RT     | MHb    | LHb    | ZI     | SPF    |
|---------|--------|--------|--------|---------|--------|--------|--------|--------|--------|--------|--------|--------|--------|--------|--------|--------|--------|--------|--------|--------|--------|--------|--------|--------|
| DLG     | 0.9726 | 0.8061 | 0.8993 | 0.9289  | 0.9190 | 0.8836 | 0.9098 | 0.9046 | 0.9026 | 0.8176 | 0.8021 | 0.7766 | 0.8978 | 0.7873 | 0.8228 | 0.8774 | 0.8363 | 0.8746 | 0.8227 | 0.8075 | 0.5640 | 0.7586 | 0.7827 | 0.8506 |
| PG      | 0.7878 | 0.9785 | 0.8134 | 0.7487  | 0.8177 | 0.8032 | 0.7796 | 0.8038 | 0.8317 | 0.7846 | 0.7503 | 0.7984 | 0.7536 | 0.8246 | 0.8265 | 0.7852 | 0.7979 | 0.7886 | 0.8278 | 0.8740 | 0.6379 | 0.8200 | 0.8999 | 0.8899 |
| MGN     | 0.8025 | 0.7603 | 0.9571 | 0.8499  | 0.7997 | 0.8057 | 0.9027 | 0.8269 | 0.9067 | 0.7338 | 0.8381 | 0.7761 | 0.9208 | 0.7971 | 0.8230 | 0.8420 | 0.8427 | 0.8382 | 0.7451 | 0.7462 | 0.5510 | 0.7841 | 0.7442 | 0.8494 |
| VPL/VPI | 0.9295 | 0.7890 | 0.8880 | 0.9867  | 0.9412 | 0.8932 | 0.9100 | 0.9105 | 0.8984 | 0.8302 | 0.7933 | 0.8231 | 0.8812 | 0.7646 | 0.8057 | 0.8653 | 0.8397 | 0.8746 | 0.7969 | 0.8204 | 0.5513 | 0.7598 | 0.7798 | 0.8151 |
| VAVL    | 0.9140 | 0.7724 | 0.8858 | 0.9111  | 0.9866 | 0.9230 | 0.9419 | 0.9386 | 0.8897 | 0.8460 | 0.8507 | 0.8564 | 0.8648 | 0.8302 | 0.8536 | 0.8976 | 0.8490 | 0.8949 | 0.8208 | 0.8342 | 0.5839 | 0.7737 | 0.7671 | 0.8399 |
| VM      | 0.8856 | 0.7952 | 0.8790 | 0.8812  | 0.9188 | 0.9470 | 0.9363 | 0.8890 | 0.8935 | 0.8121 | 0.8516 | 0.8325 | 0.8989 | 0.8550 | 0.8700 | 0.9093 | 0.9217 | 0.9154 | 0.8555 | 0.8210 | 0.6007 | 0.8175 | 0.7652 | 0.8911 |
| MD      | 0.9013 | 0.7822 | 0.9070 | 0.9172  | 0.9281 | 0.9142 | 0.9765 | 0.9073 | 0.9291 | 0.8223 | 0.8955 | 0.8562 | 0.9192 | 0.8567 | 0.8874 | 0.9784 | 0.9138 | 0.9764 | 0.8369 | 0.8137 | 0.5837 | 0.7679 | 0.7714 | 0.8594 |
| LD      | 0.8578 | 0.8020 | 0.8652 | 0.9431  | 0.9015 | 0.8952 | 0.9353 | 0.9432 | 0.8824 | 0.8664 | 0.8223 | 0.8289 | 0.9012 | 0.8186 | 0.8724 | 0.8848 | 0.8658 | 0.8835 | 0.8219 | 0.8182 | 0.6078 | 0.7955 | 0.7942 | 0.8307 |
| Po      | 0.8863 | 0.7921 | 0.9246 | 0.8850  | 0.8906 | 0.8871 | 0.9382 | 0.8910 | 0.9712 | 0.7856 | 0.8568 | 0.8266 | 0.9603 | 0.8120 | 0.8497 | 0.9116 | 0.8655 | 0.9054 | 0.8268 | 0.7801 | 0.5862 | 0.7869 | 0.7884 | 0.8459 |
| AD      | 0.8335 | 0.8179 | 0.7819 | 0.8439  | 0.8442 | 0.8201 | 0.8633 | 0.8580 | 0.8381 | 0.9594 | 0.8523 | 0.8670 | 0.8015 | 0.8131 | 0.8650 | 0.8455 | 0.8142 | 0.8140 | 0.7983 | 0.8132 | 0.6355 | 0.7979 | 0.8133 | 0.8034 |
| AM      | 0.8452 | 0.7877 | 0.8549 | 0.8028  | 0.8683 | 0.8744 | 0.9116 | 0.8864 | 0.8907 | 0.8722 | 0.9402 | 0.9041 | 0.8902 | 0.8409 | 0.8750 | 0.9045 | 0.8875 | 0.9147 | 0.7987 | 0.7854 | 0.5596 | 0.7710 | 0.7522 | 0.8321 |
| AV      | 0.8629 | 0.7811 | 0.7867 | 0.8379  | 0.8634 | 0.8509 | 0.8872 | 0.9056 | 0.8936 | 0.8964 | 0.9003 | 0.9307 | 0.8967 | 0.8008 | 0.8588 | 0.8950 | 0.8355 | 0.8817 | 0.7813 | 0.8166 | 0.5865 | 0.7640 | 0.7620 | 0.8132 |
| LP      | 0.8694 | 0.7856 | 0.9306 | 0.8521  | 0.8800 | 0.8948 | 0.9177 | 0.8885 | 0.9540 | 0.8190 | 0.8438 | 0.8227 | 0.9853 | 0.8550 | 0.8733 | 0.9005 | 0.8734 | 0.8936 | 0.8231 | 0.7796 | 0.5830 | 0.8220 | 0.7735 | 0.8904 |
| PV      | 0.7505 | 0.8105 | 0.7697 | 0.7177  | 0.8019 | 0.8006 | 0.8183 | 0.7960 | 0.8531 | 0.8153 | 0.8336 | 0.8091 | 0.8337 | 0.9088 | 0.8879 | 0.8178 | 0.8616 | 0.8079 | 0.7763 | 0.7483 | 0.6866 | 0.8132 | 0.7853 | 0.8133 |
| PT      | 0.7662 | 0.8212 | 0.7685 | 0.7611  | 0.8001 | 0.8495 | 0.8709 | 0.7979 | 0.8300 | 0.8057 | 0.8683 | 0.8185 | 0.8348 | 0.8821 | 0.9899 | 0.8690 | 0.8625 | 0.8756 | 0.7955 | 0.7707 | 0.6328 | 0.8289 | 0.7956 | 0.8398 |
| IMD     | 0.8264 | 0.7975 | 0.8442 | 0.8461  | 0.8720 | 0.9053 | 0.9085 | 0.8457 | 0.9024 | 0.8121 | 0.8077 | 0.8372 | 0.8975 | 0.9088 | 0.9100 | 0.9339 | 0.9047 | 0.9770 | 0.8386 | 0.7691 | 0.6065 | 0.7939 | 0.7690 | 0.8399 |
| Re      | 0.8099 | 0.8193 | 0.8131 | 0.7579  | 0.7970 | 0.8696 | 0.8701 | 0.8284 | 0.8574 | 0.8279 | 0.8560 | 0.8263 | 0.8410 | 0.8957 | 0.9306 | 0.8923 | 0.9373 | 0.9010 | 0.8409 | 0.7674 | 0.6279 | 0.8196 | 0.7844 | 0.8751 |
| CM      | 0.8260 | 0.8004 | 0.8688 | 0.8038  | 0.8704 | 0.8912 | 0.9272 | 0.8714 | 0.9218 | 0.8316 | 0.8965 | 0.8450 | 0.8990 | 0.8674 | 0.9066 | 0.9692 | 0.9092 | 0.9786 | 0.8549 | 0.7723 | 0.5933 | 0.8096 | 0.7743 | 0.8535 |
| PF      | 0.7884 | 0.8418 | 0.8348 | 0.7843  | 0.8001 | 0.8213 | 0.8501 | 0.8604 | 0.8655 | 0.8270 | 0.7894 | 0.7949 | 0.8216 | 0.8671 | 0.8575 | 0.8269 | 0.8500 | 0.8546 | 0.9635 | 0.7889 | 0.6384 | 0.8281 | 0.8509 | 0.8828 |
| RT      | 0.8344 | 0.8704 | 0.7810 | 0.7976  | 0.8349 | 0.8152 | 0.8383 | 0.8067 | 0.8251 | 0.8374 | 0.7641 | 0.8047 | 0.7722 | 0.7667 | 0.8084 | 0.7867 | 0.7611 | 0.8190 | 0.7692 | 0.9431 | 0.6092 | 0.7919 | 0.8573 | 0.8268 |
| MHb     | 0.5863 | 0.6227 | 0.5945 | 0.5405  | 0.5793 | 0.6436 | 0.5853 | 0.6617 | 0.6263 | 0.6759 | 0.6290 | 0.6509 | 0.5339 | 0.7594 | 0.6027 | 0.5702 | 0.7028 | 0.5902 | 0.6913 | 0.6192 | 0.9143 | 0.8135 | 0.6097 | 0.7022 |
| LHb     | 0.6970 | 0.8741 | 0.6555 | 0.7226  | 0.7740 | 0.7770 | 0.7935 | 0.7465 | 0.7426 | 0.7943 | 0.7819 | 0.7703 | 0.7667 | 0.8917 | 0.8089 | 0.7756 | 0.8397 | 0.8462 | 0.8408 | 0.8308 | 0.7442 | 0.9466 | 0.8421 | 0.8626 |
| ZI      | 0.7846 | 0.9267 | 0.8356 | 0.7465  | 0.8104 | 0.8007 | 0.7914 | 0.8315 | 0.8191 | 0.8196 | 0.7600 | 0.7954 | 0.7798 | 0.8251 | 0.8049 | 0.7664 | 0.8395 | 0.7742 | 0.8381 | 0.8775 | 0.6151 | 0.8318 | 0.9396 | 0.9131 |
| SPF     | 0.8119 | 0.9022 | 0.8466 | 0.8142  | 0.8179 | 0.8974 | 0.8454 | 0.8447 | 0.8986 | 0.8190 | 0.7983 | 0.8007 | 0.8743 | 0.8821 | 0.8403 | 0.8516 | 0.8738 | 0.8245 | 0.8920 | 0.7987 | 0.6722 | 0.8194 | 0.8996 | 0.9612 |

## Mean correlation

|        | DLG    | PG     | MGN    | VPL/VF | VA/VL  | VM     | MD     | LD     | Po     | AD     | AM     | AV     | LP     | PV     | PT     | IMD    | Re     | CM     | PF     | RT     | MHb    | LHb    | ZI     | SPF    |
|--------|--------|--------|--------|--------|--------|--------|--------|--------|--------|--------|--------|--------|--------|--------|--------|--------|--------|--------|--------|--------|--------|--------|--------|--------|
| DLG    | 0.9726 |        |        |        |        |        |        |        |        |        |        |        |        |        |        |        |        |        |        |        |        |        |        |        |
| PG     | 0.7969 | 0.9785 |        |        |        |        |        |        |        |        |        |        |        |        |        |        |        |        |        |        |        |        |        |        |
| MGN    | 0.8509 | 0.7868 | 0.9571 |        |        |        |        |        |        |        |        |        |        |        |        |        |        |        |        |        |        |        |        |        |
| VPL/VF | 0.9292 | 0.7689 | 0.8690 | 0.9867 |        |        |        |        |        |        |        |        |        |        |        |        |        |        |        |        |        |        |        |        |
| VA/VL  | 0.9165 | 0.7951 | 0.8428 | 0.9261 | 0.9866 |        |        |        |        |        |        |        |        |        |        |        |        |        |        |        |        |        |        |        |
| VM     | 0.8846 | 0.7992 | 0.8424 | 0.8872 | 0.9209 | 0.9470 |        |        |        |        |        |        |        |        |        |        |        |        |        |        |        |        |        |        |
| MD     | 0.9055 | 0.7809 | 0.9049 | 0.9136 | 0.9350 | 0.9253 | 0.9765 |        |        |        |        |        |        |        |        |        |        |        |        |        |        |        |        |        |
| LD     | 0.8812 | 0.8029 | 0.8461 | 0.9268 | 0.9201 | 0.8921 | 0.9213 | 0.9432 |        |        |        |        |        |        |        |        |        |        |        |        |        |        |        |        |
| Po     | 0.8944 | 0.8119 | 0.9156 | 0.8917 | 0.8902 | 0.8903 | 0.9336 | 0.8867 | 0.9712 |        |        |        |        |        |        |        |        |        |        |        |        |        |        |        |
| AD     | 0.8256 | 0.8012 | 0.7578 | 0.8371 | 0.8451 | 0.8161 | 0.8428 | 0.8622 | 0.8119 | 0.9594 |        |        |        |        |        |        |        |        |        |        |        |        |        |        |
| AM     | 0.8236 | 0.7690 | 0.8465 | 0.7981 | 0.8595 | 0.8630 | 0.9035 | 0.8544 | 0.8738 | 0.8622 | 0.9402 |        |        |        |        |        |        |        |        |        |        |        |        |        |
| AV     | 0.8198 | 0.7898 | 0.7814 | 0.8305 | 0.8599 | 0.8417 | 0.8717 | 0.8672 | 0.8601 | 0.8817 | 0.9022 | 0.9307 |        |        |        |        |        |        |        |        |        |        |        |        |
| LP     | 0.8836 | 0.7696 | 0.9257 | 0.8667 | 0.8724 | 0.8968 | 0.9184 | 0.8948 | 0.9571 | 0.8102 | 0.8670 | 0.8597 | 0.9853 |        |        |        |        |        |        |        |        |        |        |        |
| PV     | 0.7689 | 0.8175 | 0.7834 | 0.7412 | 0.8161 | 0.8278 | 0.8375 | 0.8073 | 0.8326 | 0.8142 | 0.8372 | 0.8049 | 0.8444 | 0.9088 |        |        |        |        |        |        |        |        |        |        |
| PT     | 0.7945 | 0.8239 | 0.7957 | 0.7834 | 0.8269 | 0.8598 | 0.8792 | 0.8352 | 0.8399 | 0.8354 | 0.8716 | 0.8387 | 0.8540 | 0.8850 | 0.9899 |        |        |        |        |        |        |        |        |        |
| IMD    | 0.8519 | 0.7914 | 0.8276 | 0.8557 | 0.8848 | 0.9073 | 0.9435 | 0.8653 | 0.9070 | 0.8288 | 0.8561 | 0.8661 | 0.8990 | 0.8633 | 0.8895 | 0.9339 |        |        |        |        |        |        |        |        |
| Re     | 0.8231 | 0.8086 | 0.8558 | 0.7988 | 0.8230 | 0.8956 | 0.8919 | 0.8471 | 0.8615 | 0.8211 | 0.8717 | 0.8309 | 0.8572 | 0.8787 | 0.8965 | 0.8985 | 0.9373 |        |        |        |        |        |        |        |
| CM     | 0.8503 | 0.7945 | 0.8535 | 0.8392 | 0.8827 | 0.9033 | 0.9518 | 0.8774 | 0.9136 | 0.8228 | 0.9056 | 0.8634 | 0.8963 | 0.8377 | 0.8911 | 0.9731 | 0.9051 | 0.9786 |        |        |        |        |        |        |
| PF     | 0.8056 | 0.8348 | 0.7900 | 0.7906 | 0.8104 | 0.8384 | 0.8435 | 0.8412 | 0.8462 | 0.8127 | 0.7941 | 0.7881 | 0.8224 | 0.8217 | 0.8265 | 0.8328 | 0.8454 | 0.8548 | 0.9635 |        |        |        |        |        |
| RT     | 0.8210 | 0.8722 | 0.7636 | 0.8090 | 0.8346 | 0.8181 | 0.8260 | 0.8124 | 0.8026 | 0.8253 | 0.7748 | 0.8107 | 0.7759 | 0.7575 | 0.7896 | 0.7779 | 0.7643 | 0.7957 | 0.7791 | 0.9431 |        |        |        |        |
| MHb    | 0.5751 | 0.6303 | 0.6033 | 0.5459 | 0.5816 | 0.6222 | 0.5845 | 0.6347 | 0.6063 | 0.6557 | 0.5943 | 0.6187 | 0.5585 | 0.7230 | 0.6178 | 0.5884 | 0.6653 | 0.5918 | 0.6648 | 0.6142 | 0.9143 |        |        |        |
| LHb    | 0.7278 | 0.8471 | 0.8099 | 0.7412 | 0.7738 | 0.7972 | 0.7807 | 0.7710 | 0.7647 | 0.7961 | 0.7764 | 0.7672 | 0.7943 | 0.8525 | 0.8189 | 0.7847 | 0.8296 | 0.8279 | 0.8344 | 0.8114 | 0.7789 | 0.9466 |        |        |
| ZI     | 0.7837 | 0.9133 | 0.7899 | 0.7632 | 0.7888 | 0.7829 | 0.7814 | 0.8128 | 0.8037 | 0.8164 | 0.7561 | 0.7787 | 0.7766 | 0.8052 | 0.8002 | 0.7677 | 0.8119 | 0.7743 | 0.8445 | 0.8674 | 0.6124 | 0.8369 | 0.9396 |        |
| SPF    | 0.8509 | 0.8758 | 0.8480 | 0.8146 | 0.8289 | 0.8942 | 0.8524 | 0.8377 | 0.8722 | 0.8112 | 0.8152 | 0.8069 | 0.8824 | 0.8477 | 0.8400 | 0.8458 | 0.8745 | 0.8390 | 0.8874 | 0.8128 | 0.6872 | 0.8410 | 0.9063 | 0.9612 |
