# Supplementary material for: Molecular anatomy of the thalamic complex and the underlying transcription factors
Source: Springer Nature journal article supplement (doi:10.1007/s00429-015-1052-5), 2015-05-11
Supplement: MOESM5 [file 8502600]

## Supplementary Material

### Figure S1

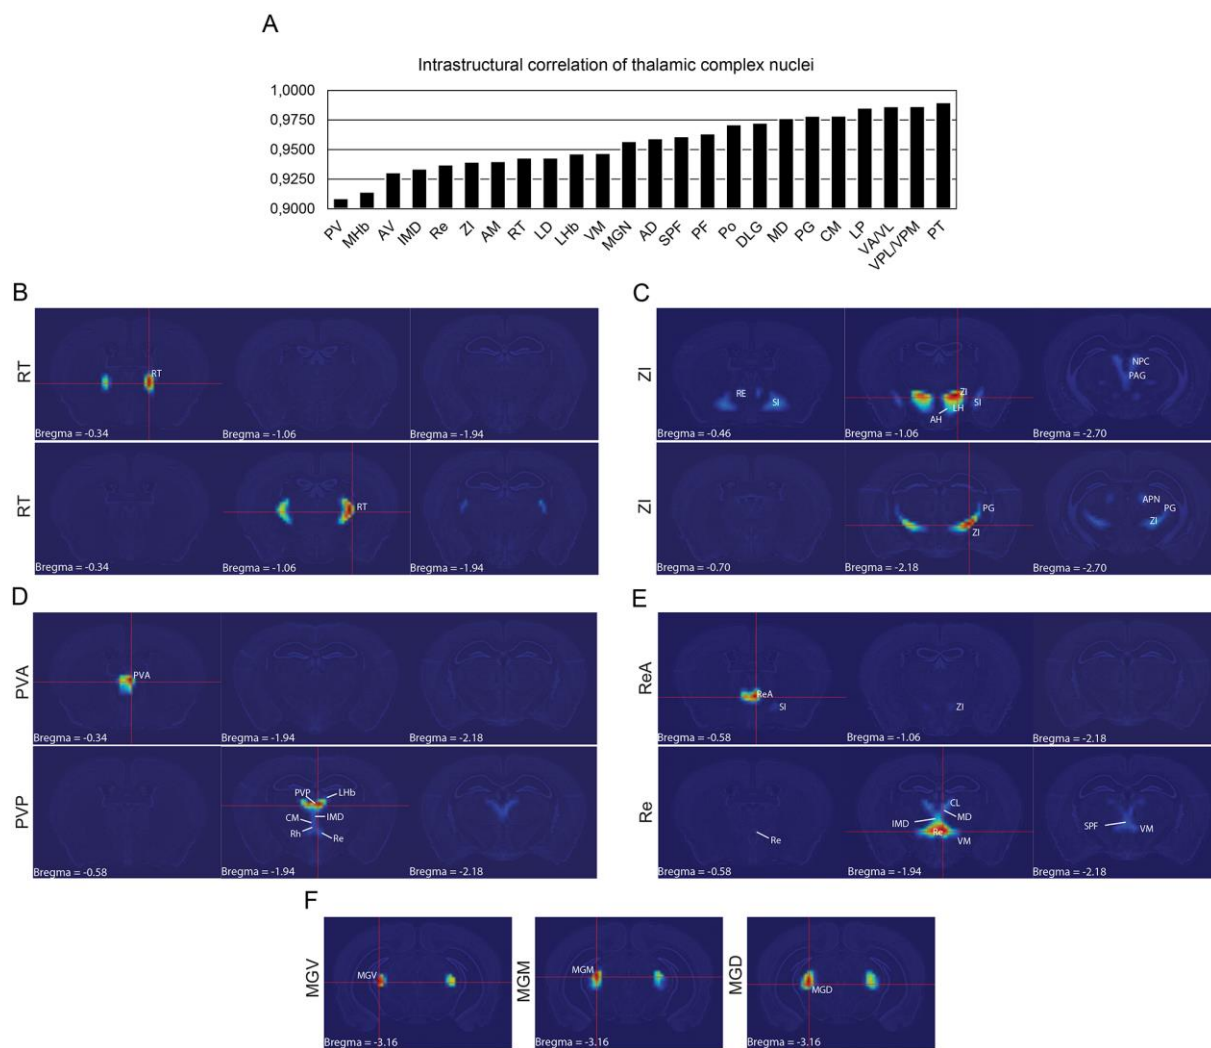

**Figure S1.** (A) Thalamic complex nuclei ranked by increasing value of intrastructural correlation calculated from AGEA analysis. (B-F) AGEA spatial gene expression correlation maps for selected heterogeneous thalamic nuclei. The computed correlation values are displayed with false-color images using a blue-to-red color scale (“heat map”) with the threshold interval set to [0.9, 1]. Nuclei with intrastructural similarity lower than 0.95 (see text) were reexamined by placing additional seed voxels in different parts of them; this revealed molecular subdomains within (A) RT, (B) ZI, (C) PV, (D) Re nuclei. Three panels ordered from rostral to caudal are shown for each seed voxel. The heterogeneity of MGN (E) was reexamined by placing seed voxels in different parts of this nucleus.

## Figure S2

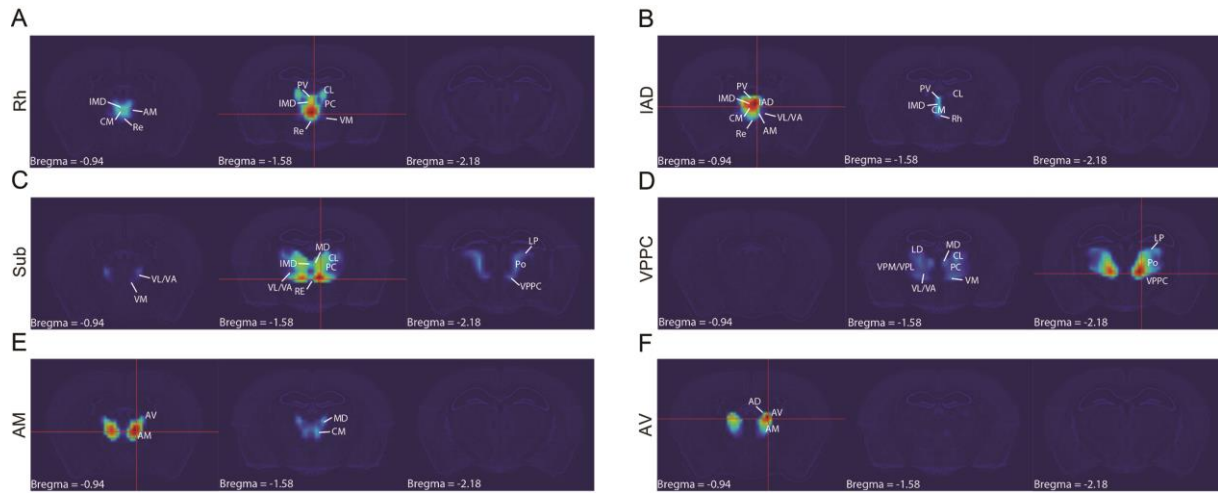

**Figure S2.** AGEA spatial gene expression correlation maps for additional thalamic nuclei. Seed voxels were placed in (A) Rh, (B) IAD, (C) Sub, (D) VPPC, (E) AM and (F) AV. The computed correlation values are displayed with false-color images using a blue-to-red color scale (“heat map”), with the threshold interval set to [0.9, 1]. For a detailed description of AGEA spatial gene expression correlation maps, see (Ng et al. 2009). Three panels ordered from rostral to caudal are shown for each seed voxel.

**Figure S3**

**Prethalamus**

| Entrez id | Gene symbol | Gene name                                   |
|-----------|-------------|---------------------------------------------|
| 2104      | ESRRG       | estrogen-related receptor gamma             |
| 3170      | FOXA2       | forkhead box A2                             |
| 3231      | HOXD1       | homeobox D1                                 |
| 3670      | ISL1        | ISL LIM homeobox 1                          |
| 4212      | MEIS2       | meis homeobox 2                             |
| 9603      | NFE2L3      | nuclear factor (erythroid-derived 2)-like 3 |
| 4821      | NKX2-2      | NK2 homeobox 2                              |
| 6496      | SIX3        | SIX homeobox 3                              |
| 30812     | SOX8        | SRY (sex determining region Y)-box 8        |
| 9839      | ZEB2        | zinc finger E-box binding homeobox 2        |

**Epithalamus**

| Entrez id | Gene symbol | Gene name                                       |
|-----------|-------------|-------------------------------------------------|
| 79190     | IRX6        | iroquois homeobox 6                             |
| 4760      | NEUROD1     | neuronal differentiation 1                      |
| 4929      | NR4A2       | nuclear receptor subfamily 4, group A, member 2 |
| 5457      | POU4F1      | POU class 4 homeobox 1                          |
| 5459      | POU4F3      | POU class 4 homeobox 3                          |

**Thalamus**

| Entrez id | Gene symbol | Gene name                                                              |
|-----------|-------------|------------------------------------------------------------------------|
| 8553      | BHLHE40     | basic helix-loop-helix family, member e40                              |
| 2115      | ETV1        | ets variant 1                                                          |
| 27086     | FOXP1       | forkhead box P1                                                        |
| 93986     | FOXP2       | forkhead box P2                                                        |
| 2625      | GATA3       | GATA binding protein 3                                                 |
| 2637      | GBX2        | gastrulation brain homeobox 2                                          |
| 3400      | ID4         | inhibitor of DNA binding 4, dominant negative helix-loop-helix protein |
| 51176     | LEF1        | lymphoid enhancer-binding factor 1                                     |
| 9355      | LHX2        | LIM homeobox 2                                                         |
| 56956     | LHX9        | LIM homeobox 9                                                         |
| 84504     | NKX6-2      | NK6 homeobox 2                                                         |
| 7025      | NR2F1       | nuclear receptor subfamily 2, group F, member 1                        |
| 5015      | OTX2        | orthodenticle homeobox 2                                               |
| 5629      | PROX1       | prospero homeobox 1                                                    |
| 6095      | RORA        | RAR-related orphan receptor A                                          |
| 83482     | SCRT1       | scratch homolog 1, zinc finger protein                                 |
| 6474      | SHOX2       | short stature homeobox 2                                               |
| 8403      | SOX14       | SRY (sex determining region Y)-box 14                                  |
| 6934      | TCF7L2      | transcription factor 7-like 2 (T-cell specific, HMG-box)               |
| 9760      | TOX         | thymocyte selection-associated high mobility group box                 |
| 463       | ZFH3        | zinc finger homeobox 3                                                 |
| 7545      | ZIC1        | zic family member 1                                                    |
| 7546      | ZIC2        | zic family member 2                                                    |
| 7547      | ZIC3        | zic family member 3                                                    |
| 84107     | ZIC4        | zic family member 4                                                    |
| 79698     | ZMAT4       | zinc finger, matrin-type 4                                             |
| 151126    | ZNF385B     | zinc finger protein 385B                                               |
| 23090     | ZNF423      | zinc finger protein 423                                                |
| 91752     | ZNF804A     | zinc finger protein 804a                                               |

**Figure S3. List of transcription factors enriched in human thalamic complex.** Genes were selected after manual inspection of genes found using “Differential Search tool” in Human Brain Atlas (<http://human.brain-map.org/>). Genes marked in red are conserved between human and mouse.

## Supplementary experimental procedures

### *Sequence analysis and promoter cloning*

Global pair-wise alignment of three kb upstream and two kb downstream of the predicted human and mouse transcription start sites were done using mVISTA-AVID (Frazer et al. 2004), using default parameters, to identify putative conserved regulatory sequences. Predicted LEF1/TCF binding sites (described by matrix family V\$LEFF) were identified using MatInspector (Genomatix) with the default (optimized) threshold. Gene annotation information is derived from the Ensembl database. The promoter sequences after PCR amplification (primers sequences below) were attached to the firefly luciferase gene of the pTA-Luc plasmid (Promega), which lacks the minimal TA promoter, as described previously (Wisniewska et al. 2010).

*Etv1* (ENSMUST00000095767) -2196, +279

(forward with MluI site *Etv1\_M\_F* TATCTTACGCGTAGACAAAGGGTCCTTAGTC  
reverse with XhoI site *Etv1\_X\_R* ATCTAACTCGAGAATTATTGCCAGCACTTCC)

*Foxp2* (ENSMUST00000031545) -1892, +93

(F with KpnI site ACACCGGTACCGGAGACATGTGGAG  
Reverse with MluI site CGAACGCGTCCCACACTGATGGC)

*Gbx2* (ENSMUST00000036954) 0 acc to NM\_010262.3, -1964, +176

(forward with KpnI site, ATCTTAGGTACCAAGGTAGTGGCATTGAAG  
reverse with MluI site, TATCTTACGCGTTCGCCGGAACCGCTC)

*Mef2c* 0 acc to ENST00000437473 -1394, +178

(forward with XhoI site: 5'-ATCTAACTCGAGCATTCTCCGAGGAAGCTGTC-3'

reverse with XhoI site: 5'-ATCTAACTCGAGTTTGTCCAGCCTTGAAGTGC-3'

*Nr4a2* Nurr1 (ENSMUST00000028166) -1735, +299

forward with KpnI site, ATCTTAGGTACCTTTCGTTCCGCGTGGAATCG

reverse with MluI site, TATCTTACGCGTTCAACTCCGCCGAAGTGC

*Pou4f1* Brn3a (ENSMUST00000053016) -1888, +12

forward with MluI site, TATCTTACGCGTTGGACTCACTCTTCCCTC

reverse with XhoI site, ATCTAACTCGAGATCCCGCTTCTCCGAGAG

*Rora* (ENSMUST00000034766) -1905, +36

forward with XhoI site, ATCTAACTCGAGACTTCTGTCCCAGAGGAAG

reverse with XhoI site, ATCTAACTCGAGCCGGAGCTGACTCCATG

*Zfp804a* (ENSMUST00000047527) -1470, +123

forward with MluI site, TTACTIONACGCGTATTTCTGGGTGACCTCCTC

reverse with XhoI site, ATCTAACTCGAGTTGCTGGTCCATCGCACTG

*Zic1* (ENSMUST00000034927) -2133, -9

Forward mZic1 MluI, ATGTGAAAGGACGCGTTGAAGG

Reverse mZic1 NheI, ATAGCAGCTAGCATTCTCTGCAG

### *Plasmids*

Constructs used for transfection were: CMV expression plasmids: mouse *Lef1* (from Prof. Rudolf Grosschedl, Max Planck Institute of Immunobiology, Freiburg, Germany), mouse Tcf712-E2, Tcf712-S3 (Nagalski et al. 2013), mouse  $\beta$ -catenin (from Prof. Rolf Kemler, Max

Planck Institute of Immunobiology). Deletion constructs of Tcf7l2-S3 isoforms (i.e.:  $\Delta_{30}$ TCF7L2-S, and  $\Delta_{161}$ TCF7L2-S) were PCR amplified from the Tcf7l2-S3 plasmid and cloned to the pCG vector.

### *Luciferase Assay*

HeLa cells (ATTC) were cultured in Dulbecco's modified Eagle's medium (Invitrogen) containing 10% fetal bovine serum (Sigma) and 100 units/ml penicillin-streptomycin.  $2 \times 10^4$  cells (per well of a 24-well plate) were transfected using polyethylene-amine reagent, 24 h after plating. The cells received a mixture of 250 ng of reporter plasmids with promoters, 250 ng of expression vectors, and reporter vector pRL-TK expressing luciferase from Renilla (Promega). The total amount of transfected DNA was kept constant by adding appropriate amounts of the empty expression vector pCG. Two days after transfection, the cells were washed with PBS, lysed in Passive Lysis Buffer (Promega), and the obtained signal was detected with a Lumistar Galaxy (BMG) luminometer, using jointly the luciferase buffer (50mM Tris-HCl, 11mM MgCl<sub>2</sub>, 10mM dithiothreitol, 0.2mM ATP, 0.5mM D-Luciferin, 0.25mM Coenzyme A) and the Renilla luciferase buffer (50mM Tris-HCl, 100mM NaCl, 2,5 $\mu$ M coelenterazine). Reporter gene activities were normalized against Renilla luciferase activity. Difference to the relative mean for each reporter was calculated with two-tailed Mann-Whitney test.

### **Supplementary Literature**

Frazer KA, Pachter L, Poliakov A, Rubin EM, Dubchak I. 2004. VISTA: computational tools for comparative genomics. *Nucleic Acids Res* 32:W273-279.
